1 Dynamics of finely resolved, abundant symbiotic marine plankton and other  
2 interacting microbes via automated high-frequency sampling

3

4

5

6

7

8

9

10

11

12 David M. Needham<sup>1,3</sup>, Erin B. Fichot<sup>1</sup>, Ellice Wang<sup>1</sup>, Lyria Berdjeb<sup>1</sup>, Jacob A. Cram<sup>1</sup>,

13 Cedric G. Fichot<sup>2</sup>, Jed A. Fuhrman<sup>1</sup>

14

15 <sup>1</sup>Department of Biological Sciences, University of Southern California

16 <sup>2</sup>Department of Earth and Environment, Boston University

17

18 Contacts

19 David M. Needham, [dmneedha@gmail.com](mailto:dmneedha@gmail.com)

20 Jed A. Fuhrman, [fuhrman@usc.edu](mailto:fuhrman@usc.edu)

21

22

23

24

25

26

27

28

29

30

31

Conflicts of Interest: The authors declare no conflict of interest.

32 **Abstract**

33 Short time-scale observations are valuable for understanding microbial ecological  
34 processes. We assessed dynamics in relative abundance and potential activities by  
35 sequencing the small sub-unit ribosomal RNA gene (rDNA) and rRNA molecules  
36 (rRNA), of Bacteria, Archaea and Eukaryotes once to twice-daily between March and  
37 May in the surface ocean off Catalina Island, California. Typically *Ostreococcus*,  
38 *Braarudosphaera*, *Teleaulax*, and *Synechococcus* dominated phytoplankton  
39 sequences while SAR11, *Sulfitobacter* and *Fluvicola* dominated non-phytoplankton  
40 prokaryotes. We observed short-lived increases of diatoms, mostly *Pseudo-nitzschia*  
41 and *Chaetoceros*, with quickly-responding prokaryotes including Flavobacteria  
42 (*Polaribacter*, *Formosa*), *Roseovarius*, and Euryarchaea (MGII), which were the exact  
43 sequence variants we also observed as temporally most-abundant in another  
44 diatom bloom at a nearby location, 3 years prior. We observed positive correlations  
45 representing known interactions among abundant taxa in chloroplastic rRNA  
46 sequences, demonstrating the ecological relevance of such interactions and their  
47 influence on the environment: 1) The kleptochloroplastidic ciliate *Myrionecta* 18S  
48 and *Teleaulax* chloroplasts (16S) were correlated (Spearman  $r = 0.83$ ) yet  
49 uncorrelated to *Teleaulax* nuclear 18S, nor any other taxon and 2) the  
50 photosynthetic prymnesiophyte *Braarudosphaera bigelowii* and 2 strains of  
51 diazotrophic cyanobacterium UCYN-A were correlated and each was correlated to  
52 multiple other taxa, including *Braarudosphaera* to a Verrucomicrobium and a  
53 Dictyophyte phytoplankter (all  $r > 0.8$ ). We also report strong correlations ( $r > 0.7$ )  
54 between ciliates and bacteria and phytoplankton, possibly representing mutually  
55 beneficial interactions. These data reiterate the utility of high-frequency time-series  
56 to show rapid microbial reactions to stimuli, and provide new information about *in-*  
57 *situ* dynamics of previously recognized and hypothesized interactions.

58

59

60

61

62

## 63 **Introduction**

64 Natural marine microbial communities, consisting of both prokaryotes and  
65 eukaryotes, are diverse and dynamic. The interactions between microbial species  
66 and their environment and between microbial species dictate how energy and  
67 nutrients flow through the ocean (Fuhrman et al. 2015). Microbial communities are  
68 known to be seasonally variable (Gilbert et al. 2012; Fuhrman et al. 2006; Cram et al.  
69 2014) and can show rapid responses to environmental variation, such as  
70 stratification and pulses of nutrients (Teeling et al. 2012; Needham & Fuhrman  
71 2016). Time-series studies with sampling at various temporal-scales contribute to  
72 our understanding of different processes in the sea, such as seasonal variation or  
73 climate change. Daily or diel-scale high-resolution time-series are particularly useful  
74 for observing ecological responses to short-term perturbations, such as  
75 phytoplankton blooms and interactions of organisms, because whole microbial  
76 community turnover time is on the scale of a few days (Fuhrman & Azam 1982;  
77 Cram et al. 2014). During phytoplankton blooms, microbial communities can vary in  
78 pronounced, succession-like ways with dominant taxa shifting quickly (Teeling et al.  
79 2016, 2012), even on time scales of one to several days (Needham and Fuhrman  
80 2016; Needham et al. 2017).

81 Ecological interactions between microorganisms are of great importance in the  
82 ocean (Worden et al. 2015). Such interactions can be general, such as lineages of  
83 bacteria that repeatedly respond to increases in phytoplankton biomass and the  
84 organic matter produced by blooms (Buchan et al. 2014). However, many  
85 interactions appear to be species specific, including direct microbe-microbe  
86 interactions and can be observed at short temporal scales (Fuhrman et al. 2015).  
87 Such interactions include grazing, cross-feeding, mutualism, parasitism, symbiosis,  
88 or kleptochloroplasty (i.e., where a heterotrophic protist captures chloroplasts from  
89 another species and the chloroplast continues to function inside the grazer)(Mitra et  
90 al. 2016). Many of these interactions occur between organisms of different domains  
91 or trophic states; e.g., , between bacteria and eukaryotes, or between phototrophs  
92 and heterotrophs. Studying all of these organisms together allows a more complete  
93 view of components in the “microbial loop” (Azam et al. 1983).

94 The dynamics and ecology of microbial organisms via time-series is often assessed  
95 via sequencing of the small subunit ribosomal DNA gene (rDNA) of cellular  
96 organisms, which is conserved across all three domains of life. With current  
97 sequencing outputs from the Illumina MiSeq and HiSeq platform (paired end 2x250  
98 or 2x300 high quality reads), it is possible to confidently discriminate taxa by as  
99 little as a single base difference in this conserved gene, which can resolve taxa at the  
100 “strain” or species level (Eren et al. 2014; Callahan et al. 2016; Tikhonov et al. 2015).  
101 We have recently shown that a single rRNA gene primer set can simulataneously  
102 assess bacteria, archaea, and eukaryotic phytoplankton via their chloroplasts (with  
103 the exception of dinoflagellates due to aberrant chloroplast sequnces) via 16S  
104 (Needham & Fuhrman 2016; Parada et al. 2016). Using the same rRNA gene primer  
105 set, the full eukaryotic community can be assessed via 18S (Needham & Fuhrman  
106 2016; Parada et al. 2016).

107

108 A complementary approach to sequencing the rDNA is reverse transcribing and  
109 sequencing of the small sub-unit of the rRNA molecule itself (rRNA) which provides  
110 the same identity information as DNA, but the number of sequences is considered a  
111 proxy for the cumulative number of ribosomes from that taxon. This approach may  
112 reveal information about the biomasses and potential activities of taxa across the  
113 full community (Campbell et al. 2011; Hunt et al. 2013; Blazewicz et al. 2013;  
114 Lankiewicz et al. 2016). The rRNA and rDNA approaches each have benefits and  
115 uncertainties. For the rDNA, while the gene copy number varies between taxa, it is  
116 consistent within individuals of a given taxon and across time. The large majority of  
117 free living planktonic marine prokaryotes have 1-2 copies per cell (Brown &  
118 Fuhrman 2005). For chloroplasts, copy number is usually between 1-2 per  
119 chloroplast, and the number of chloroplasts per cell can vary from 1 to hundreds  
120 (depending largely on cell size; Needham and Fuhrman 2016). However, for small  
121 phytoplankton most commonly found at our location, the variation is typically low  
122 (2-4 chloroplasts for common taxa) (Needham and Fuhrman 2016). The 18S of  
123 eukaryotes, on the other hand, has a larger range in copy number, from 2 to 50,000  
124 (de Vargas et al. 2015). Thus, comparing relative abundances for these taxa via 18S

125 is tenuous, but the copy number relates very roughly to cellular biomass, when  
126 compared over many orders of magnitude on a log-log plot (de Vargas et al. 2015).  
127 rRNA in contrast may reflect variation of “potential activity” between and within  
128 taxa over time. However, the number of ribosomes per cell does not consistently  
129 reflect growth rate across taxa, since the relationship is very noisy and irregular  
130 between taxa, and it is not anything like a linear measure of growth rate (Blazewicz  
131 et al. 2013; Lankiewicz et al. 2016). Previous work has assessed the ratio between  
132 the rRNA and rDNA of individual taxa. This work results in an “index” that aims to  
133 examine the relative activities across taxa and describe patterns across all taxa. Such  
134 an analysis, with all its inherent complexities and complicating factors, is outside the  
135 scope of this paper.

136

137 Here we apply rRNA and rDNA sequencing to study the full cellular microbial  
138 community -- bacteria, archaea, and eukaryotes -- from seawater samples collected  
139 from the photic zone once to twice per day over about 1.5 months via an  
140 Environmental Sample Processor (ESP), which also provided continuous physical  
141 and chemical measurements. During the course of the sampling, a short-lived bloom  
142 of phytoplankton occurred, allowing us examine the dynamics and activities, before,  
143 during, and after the bloom. Additionally, we found that the members of two well-  
144 known symbioses were commonly found in high abundance during our time-series:  
145 1.) the ciliate *Myrionecta* and the chloroplasts of cryptophyte *Teleaulax* (Johnson et  
146 al. 2016) and 2.) the diazotrophic cyanobacterium UCYN-A and haptophyte alga  
147 *Braarudosphaera bigelowii* (Zehr et al. 2016). This allowed us to assess the *in-situ*  
148 abundances and physiological dynamics of these relationships, which provides  
149 insight into the nature of these associations. We also explore other strong co-  
150 occurrence patterns between phytoplankton, potential eukaryotic grazers, and  
151 prokaryotes to examine potential new interactions.

152

153

154

155

156 **Methods**

157 **Sampling**

158 An Environmental Sample Processor (ESP) (Scholin et al. 2009), which  
159 autonomously draws seawater samples and filters them sequentially while also  
160 recording depth, temperature, conductivity, and chlorophyll fluorescence was  
161 deployed about 1 km offshore of Santa Catalina Island, California, USA in about 200  
162 m of water (33 28.990 N, 118 30.470 W) from 13 March to 1 May, 2014. The ESP  
163 was tethered to the bottom and thus sampled via Eulerian sampling. Due to tides  
164 and tidal currents, the depth systematically varied slightly over the course of a day.  
165 Over the first 5 days, the depth of sampling was between 5 and 10 m. The ESP  
166 malfunctioned on day 6. After the instrument was restored two weeks later, samples  
167 were collected between 7 m and 15 m for the remainder of the time series (Figure  
168 1). One L water samples for molecular analysis were drawn once (at 10 AM, 18  
169 March to 23 March) or twice per day after the interruption of sampling (10 AM, 10  
170 PM, 9 April to 1 May). The samples were pre-screened with 300  $\mu\text{m}$  mesh and then  
171 sequentially collected on a 1  $\mu\text{m}$  AE filter (Pall Gelman) and a 0.22  $\mu\text{m}$  Durapore  
172 filter (Millipore) with an HA backing filter. All filters were stored in RNAlater at  
173 ambient seawater temperature until ESP retrieval (1 May), upon which the filters  
174 were stored at -80 C until processing. The ESP recorded depth, temperature,  
175 conductivity, and chlorophyll fluorescence measurements every 5 minutes.

176 **Satellite imagery**

177 Level-2 remote-sensing reflectances (*Rrs*) from *Aqua* MODIS (MODERate Resolution  
178 Imaging Spectrometer) were used to produce daily maps of surface chlorophyll-*a*  
179 concentrations over the 01 March 2014 - 30 April 2014 time period. About one third  
180 of all the images were discarded because of cloud coverage. The surface chlorophyll-  
181 *a* concentrations were derived by applying a local empirical algorithm to the  
182  $Rrs(488)/Rrs(547)$  remote-sensing reflectance ratio (Trinh et al. 2017). This local  
183 empirical algorithm was parameterized specifically for MODIS using *in situ*  
184 measurements made in the coastal waters off the Los Angeles, CA area (i.e., our  
185 region of study).

186

187 **DNA/RNA extraction**

188 Each AE and Durapore filter was aseptically cut in half, one half for DNA extraction,  
189 the other half for RNA extraction. DNA was extracted and purified from the  
190 Durapore filters using a hot SDS extraction protocol (Fuhrman et al. 1988) and from  
191 the AE filters using a NaCl/cetyl trimethylammonium bromide (CTAB) bead-beating  
192 extraction (Countway et al. 2005). Each of these methods was modified to include  
193 lysozyme and proteinase K lysis steps (30 minutes at 37 C and 30 minutes at 50 C,  
194 respectively). Supernatant from either method was subjected to  
195 phenol/chloroform/isoamyl alcohol purification, precipitated overnight in  
196 ammonium acetate and ethanol, then resuspended in TE buffer. Each half-filter  
197 underwent two sequential lysis steps, and the extracted DNA was combined.  
198 RNA was extracted from the Durapore and AE filter via RNeasy kit (Qiagen), as per  
199 manufacturer's instructions, including an on-column DNase step. For the AE filters,  
200 a second DNA-removal step was performed on 10 ng of RNA with Invitrogen DNase  
201 I, Amplification Grade (Cat. Number: 18068015).

202 **Reverse transcription and PCR**

203 RNA was reverse transcribed to cDNA using SuperScript III from Invitrogen using  
204 random hexamers, with 0.1 ng for the Durapore size fraction and all of the RNA from  
205 the Invitrogen DNase treated AE RNA (input 10 ng). cDNA was cleaned up with 2x  
206 Ampure beads. Cleaned cDNA was then amplified for 30 cycles via PCR with 5' Hot  
207 Start master mix with 515F primer (5'- GTGYCAGCMGCCGCGGTAA -3') and 926R  
208 primer (5' - CCGYCAATTYMTTTRAGTTT -3'), which amplifies bacterial, archaeal,  
209 and chloroplast 16S, as well as eukaryotic 18S (Parada et al. 2016). We confirmed  
210 that RNA extracts were devoid of significant DNA by performing no-RT PCR  
211 reactions and observing an absence of amplification in an agarose gel. DNA from  
212 Durapore (0.5 ng) and AE (0.05 ng) was amplified 30 and 35 cycles, respectively.  
213 For the AE DNA PCR reactions, 5 extra PCR cycles and 10-fold reduced DNA  
214 template were necessary because of an inhibitory affect of the RNALater on the  
215 extracted DNA. After PCR, products were cleaned and concentrated with Ampure  
216 beads and pooled. All samples were sequenced in one MiSeq 2x300 run at  
217 University of California, Davis.

## 218 **Sequence Analysis**

219 All commands run during data analysis and figure generation are available via  
220 Figshare (10.6084/m9.figshare.5373916). Sequences are available via EMBL study  
221 accession number PRJEB22356. Demultiplexed samples were trimmed via a sliding  
222 window of 5, trimming where the window dropped below q20 via Trimmomatic.  
223 Sequences less than 200bp were removed. For 16S analysis, forward and reverse  
224 reads were then merged with a minimum overlap of 20, minimum merged length of  
225 200 and maximum differences (in overlap region) of 3 using USEARCH (Edgar  
226 2013). 18S forward and reverse reads did not overlap so this merging step retains  
227 only 16S. A separate analysis is necessary for the 18S (see below). Primers were  
228 removed from the sequences with cutadapt (Martin 2011). Chimeras were detected  
229 de novo and reference based searching with QIIME *identify\_chimeric\_seqs.py* and  
230 with the SILVA gold database (Pruesse et al. 2007) as the reference (Caporaso et al.  
231 2010). Merged 16S reads were then padded to make them all the same length with  
232 *o-pad-with-gaps* via the *Oligotyping* pipeline (Eren et al. 2013). Then the sequences  
233 were “decomposed” with Minimum Entropy Decomposition (MED) default settings  
234 (Eren et al. 2014). MED decomposes the sequences into types that are distinguished  
235 by as little as a single base, based on an assessment of the underlying sequence  
236 variability and positions of high variability. We recently confirmed such an  
237 approach to be suitable for our assays via custom made marine mock communities  
238 (Needham et al. 2017). We refer to these highly resolved sequences as Amplicon  
239 Sequence Variants (ASVs).

240

241 Sequencing classification was performed on representative sequences from the 16S  
242 ASVs via the SILVA (Pruesse et al. 2007), Greengenes (McDonald et al. 2012), and  
243 PhytoREF (Decelle et al. 2015) (for classification of Chloroplast 16S) using QIIME  
244 *assign\_taxonomy.py* with UCLUST. Additionally we classified against the NCBI  
245 database of cultured organisms (see Needham and Fuhrman 2016) with BLASTn  
246 (Altschul et al. 1990). All classifications and representative sequences are available  
247 via Figshare (Public Project Link: <https://goo.gl/nM1cwe>). Often classifications vary  
248 slightly between database sources, with the NCBI matches providing information



249 “closest cultured relative” which may not be updated in the more curated databases  
250 since they may lack the most up-to-date sequences available (e.g., see UCYN-A  
251 below). For the 16S non-phytoplankton sequences, we generally display the SILVA  
252 and Phytoref classification of the 16S ASVs of non-phytoplankton and non-  
253 phytoplankton, respectively.

254

255 Some classifications were noted to be conflicting or lacked satisfactory resolution  
256 for a given database. The reasons vary but were most often due to sequences  
257 missing from databases or misleading annotations of sequences within a database.  
258 Therefore in the following cases, we performed further manual curation of our  
259 classification: 1.) Prasinophyte sequences were all manually curated because an  
260 abundant prasinophyte sequence was initially annotated as *Ostreococcus* and  
261 *Bathycoccus* via searches against the NCBI and Phytoref databases, respectively. By  
262 manual inspection, we found that the ASV that had the discrepancy perfectly  
263 matched an *Ostreococcus genome sequence*, and made the change throughout the  
264 manuscript (Supplementary Figure 1). 2.). We found that UCYN-A sequences are  
265 generically classified by the SILVA database as Cyanobacterial Subsection I, Family I  
266 (i.e., same groups as to *Prochlorococcus* and *Synechococcus*). To resolve the UCYN-A  
267 sequences to their respective sub-groups we downloaded the sequences of UCYN-A1  
268 (Zehr et al. 2008) (gi|284809060) and UCYN-A2 (Bombar et al.  
269 2014)(gi|671395793) from NCBI and compared them to our representative ASV  
270 sequence. UCYN-A1 and UCYN-A2 are 3 bp different in the V4 to V5 amplified region  
271 we used (i.e., 99.2% similar) and each of our 2 UCYN-A ASVs matched one of each of  
272 the representative genomes at 100% (Supplementary Figure 2), thus we label them  
273 accordingly.

274

275 We split the 16S data into two datasets, the “phytoplankton” and “non-  
276 phytoplankton.” “Phytoplankton” included those sequences determined by the  
277 Greengenes taxonomy to be of chloroplastic origin and cyanobacteria. “Non-  
278 phytoplankton” included the remaining bacteria and archaeal 16S sequences. After  
279 this step, samples that did not have greater than 100 reads in a given dataset were

280 removed from further analysis. The low value of 100 increased sensitivity for to  
281 samples with a low number of reads but, the average was  $16,576 \pm 9,302$  SD for  
282 non-phytoplankton and  $13,426 \pm 11,478$  SD for phytoplankton.

283

284 The 18S amplicon sequencing products are too long to overlap given the MiSeq  
285 2x300 forward and reverse sequencing that we used. The following steps were  
286 taken to process these data. 1.) The data were quality filtered the same as for the  
287 16S analysis via Trimmomatic. 2.) The resulting quality-filtered forward and  
288 reverse reads were trimmed to 290 and 250, respectively. Reads that were shorter  
289 than those thresholds were discarded. The sequences were trimmed to the different  
290 lengths due to the difference in read qualities between the forward and reverse  
291 reads (forward is higher quality). Given these trimmed sequence lengths, the 16S  
292 reads will overlap but the 18S reads will not. 3.) We collected the 18S reads, by  
293 running all the reads through PEAR merging software, using default settings, and  
294 retained the unassembled reads. 4.) The forward and reverse reads of the  
295 unassembled reads were then joined with a degenerate base, "N", between two  
296 reads. This approach is suitable for the k-mer based classifier we used (Jeraldo et al.  
297 2014). Due to relatively low numbers of 18S sequences  $646 \pm 403$  SD reads per  
298 sample), we did not perform MED, but clustered the sequences into OTUs at 99%  
299 sequence similarity via QIIME *pick\_otus.py*, using the UCLUST option. 18S OTU  
300 representative sequences were classified with *assign\_taxonomy.py* via RDP against  
301 the PR2 database and SILVA database, and against the NCBI database as previously  
302 described using BLASTn. We generally use the PR2 classifications. All classifications  
303 and representative sequences are available via Figshare (<https://goo.gl/nM1cwe>).  
304 For the 18S data, we generally report the data as proportions of non-metazoan 18S  
305 sequences, except where specified.

306

307 Phylogenetic trees were generated for the most abundant unique sequence from the  
308 ASVs (16S) and OTUs (18S) with MUSCLE default settings with a maximum of 100  
309 iterations (Edgar 2004). Phylogenies were reconstructed using PhyML default  
310 settings (Guindon et al. 2010). Notably, in the 18S tree, *Myrionecta* is divergent from

311 the rest of the ciliates due to a very aberrant 18S sequence which has been  
312 previously reported (Johnson et al. 2004).

313

### 314 **Statistical Analysis**

315 Pairwise correlations between parameters were performed using eLSA (Xia et al.  
316 2011, 2013). Missing data were interpolated linearly (typically only a few dates per  
317 dataset, except for rRNA of 18S which had 12 (of 53) days missing), and p and q  
318 values were determined via a theoretical calculation (Xia et al. 2013). Due to the two  
319 weeks of missing data and number we did not consider time-lagged correlations for  
320 this time-series. Only correlations that had p and q < 0.005 were considered  
321 significant. Mantel tests were performed in R (R Core Team 2015) with “mantel” as  
322 part of the vegan package (Oksanen et al. 2015), on a fully overlapping datasets of  
323 41 days. We excluded the rRNA 18S dataset from this analysis since it was the most  
324 limited in number of total number of days appropriate for analysis.

### 325 **Results and Discussion**

326 Over the initial 6 days, conditions at the sample location, 1 km off Catalina Island,  
327 CA, USA, were relatively stable, with chlorophyll concentrations of 0.5-1.5 µg/L  
328 (Figure 1). After the 6<sup>th</sup> sample, the ESP malfunctioned. During the 15-day period  
329 when it was non-operational, satellite data indicated that a modest increase in  
330 phytoplankton chlorophyll occurred throughout the Southern California region. The  
331 increase in phytoplankton biomass reached closest to the location of the ESP 4 days  
332 before the instrument was repaired and sampling continued (Figure 1,  
333 Supplementary Figure 3). When sampling resumed, the chlorophyll concentrations  
334 were still elevated (though below peak levels according to satellite data) and  
335 remained between 1-5 µg/L for the remainder of the time-series. We also noted  
336 cyclical patterns within the chlorophyll data, apparently reflecting a combination of  
337 diel phytoplankton physiological variations (Dandonneau & Neveux 1997) and  
338 effects of tidal height and probably tidal current related depth variations of the  
339 instrument (Figure 1).

340

341

342 *Overall community dynamics*

343 Small sub-unit sequencing of rRNA and rDNA retrieved 16S sequences of archaea,  
344 bacteria and chloroplasts, as well as 18S of eukaryotes. Almost all of the non-  
345 phytoplankton taxa (bacteria and archaea) that we observed in these near-surface  
346 are presumed to have largely heterotrophic lifestyles, though many have  
347 phototrophic capability via proteorhodopsin (Fuhrman et al. 2008) or  
348 bacteriochlorophyll (Béjà et al. 2002; Schwalbach & Fuhrman 2005), and some are  
349 chemoautotrophs (e.g., Thaumarchaea (Könneke et al. 2005)). Although we  
350 recognize that divisions between classically defined trophic levels are increasingly  
351 recognized as being “fuzzy,” including the common occurrence of various kinds of  
352 mixotrophs (Worden et al. 2015), we aimed to separate the 16S data into functional  
353 guilds of classically-defined chlorophyll-*a* based phytoplankton and everything else  
354 (presumably largely heterotrophs). This enables a first approximation of the  
355 influence of the classic “base of the food web” (“phytoplankton”) on the rest of the  
356 food web. Due to the difficulty of accurately predicting the primary lifestyle of many  
357 eukaryotic taxa determined by 18S, because of the unknown presence of  
358 chloroplasts in some lineages and the ability of many protists to be mixotrophic  
359 (Mitra et al. 2016), we generally analyzed them as one group. For most analyses, we  
360 excluded metazoan sequences (e.g., copepods) that appeared in the data  
361 sporadically (and unintentionally, when metazoans or their fragments passed the  
362 300  $\mu\text{m}$  prefilter), and their very high 18S copy number would alter the  
363 interpretation of a primary focus, the microbial eukaryotes.

364

365 At the broadest level, the 16S rDNA sequences tended to be from non-  
366 phytoplankton taxa, especially in the smaller size fraction, averaging 58% of the  
367 total in the large size-fraction (1-300  $\mu\text{m}$ ) and 85% in the smaller size-fraction (0.22  
368 – 1  $\mu\text{m}$ )(Figure 2). Phytoplankton (via 16S) made up the majority of the rest of the  
369 rDNA sequences, 39% and 15%, respectively, of the large and small size fractions.  
370 Correspondingly, 18S made up 3.6% and 0.1% in the large and small fractions,  
371 respectively. In the large fraction rDNA, relative proportion of phytoplankton and  
372 non-phytoplankton varied considerably over the time-series, with the non-

373 photosynthetic prokaryotes being more abundant following the increase in  
374 chlorophyll concentrations (Figure 2). This suggests increased heterotrophic  
375 biomass in response to the increase in algal biomass. 18S sequences reached  
376 maximum of 20% after the region-wide increase in chlorophyll (Figure 2).

377

378 In contrast to the rDNA, the relative proportion of phytoplankton rRNA was higher  
379 than non-phytoplankton rRNA in the larger size fraction (65% and 35%,  
380 respectively) including up to 75% rRNA sequences from 19 to 22 March and for  
381 most samples between 14 to 17 April in the larger size fraction. An exception was  
382 following the small phytoplankton bloom, when the 16S rRNA sequences from non-  
383 photosynthetic taxa (like the rDNA) were up to 70% in the large size fraction. In the  
384 smaller size fraction, the proportions of non-phytoplankton and phytoplankton  
385 rRNA were of roughly equal proportion (averages of 53% and 43%, respectively),  
386 with the exception of following the phytoplankton bloom when non-phytoplankton  
387 made up >95% of the rRNA sequences in the small size fraction for several sampling  
388 dates (Figure 2). In both size fractions, 18S rRNA always constituted less than 10%  
389 of the total reads, and were almost always negligible in the small size fraction  
390 (Figure 2).

391

#### 392 *Dynamics of individual phytoplankton taxa*

393 Within the phytoplankton community, *Synechococcus* was typically the dominant  
394 taxon in both rRNA and rDNA, in both size fractions (Figure 3). In the larger size  
395 fraction, 2 different *Synechococcus* ASVs were the most abundant taxon in 24 and 44  
396 of 50 days in rDNA and rRNA, respectively. In the smaller size fraction, a single  
397 *Synechococcus* taxon was dominant in all 47 rDNA samples, and in 52 of 53 of the  
398 rRNA samples, with *Prochlorococcus* exceeding it on a single date in rRNA.

399

400 Besides *Synechococcus*, in the larger size fraction, a variety of eukaryotic  
401 phytoplankton (chloroplasts) were found to be periodically most abundant,  
402 including *Ostreococcus* (14 days), *Teleaulax* (6 days), *Imantonia* (5 days),  
403 *Braarudosphaera* (3 days), and *Pseudo-nitzschia* (1 day) (Figure 3). Several other

404 diatom ASVs, mostly *Chaetoceros sp.* and *Pseudo-nitzschia sp.*, peaked in abundance  
405 for a few days following the small phytoplankton biomass increase (potentially  
406 already decreasing by the time we resumed sampling) (Supplementary Figure 4).  
407 Pico-eukaryotic phytoplankton taxa (*Micromonas*, *Ostreococcus*) increased in  
408 numbers steadily over the second half of the time-series, and ultimately were the  
409 second and third most represented taxa in the phytoplankton rDNA on average,  
410 overall (Supplementary Figure 4). In addition, 2 ASVs of the diazotrophic, symbiotic  
411 unicellular cyanobacterium UCYN-A were cumulatively 1.1% and 5.6% on average  
412 in the large size-fraction rDNA and rRNA, respectively. UCYN-A constituted up to  
413 25% of all rRNA phytoplankton sequences in that size fraction (more detail below)  
414 (Supplementary Figure 4). This observation of high rRNA and rDNA presence of  
415 UCYN-A a productive upwelling region is highly significant from an oceanographic  
416 standpoint since they are diazotrophs, and may be an important source of bio-  
417 available nitrogen in these surface waters even during spring and proceeding  
418 increases in phytoplankton biomass. These short-term dynamics and observations  
419 of high prevalence complements their previously documented activity at this  
420 location throughout the year where they were reported as particularly active in  
421 summer and winter (Hamersley et al. 2011).

422

423 In the smaller size fraction, besides Cyanobacteria, *Ostreococcus*, *Micromonas*,  
424 *Bathycoccus*, and *Pelagomonas* were commonly abundant (Figure 3,  
425 Supplementary Figure 4). It appears that these taxa tended to be equally split  
426 between both size fractions, with the exception of *Pelagomonas*, which was  
427 primarily found in the small size fraction. Generally, Cyanobacteria tended to be a  
428 higher proportion in the rRNA than rDNA, while the opposite was the case for the  
429 eukaryotic phytoplankton in the small size fraction. This suggests that  
430 cyanobacteria are likely among the more active members of the phytoplankton  
431 community.

432

433

434

435 *Dynamics of individual non-phytoplankton taxa*

436 A single SAR11 generally dominated ASV the rDNA of the non-phytoplankton  
437 prokaryotic communities in the small size fraction (most abundant on 44 of 47  
438 samples). The larger size fraction was dominated by a more diverse set of taxa.  
439 However, in both the smaller and larger size fractions, the rRNA dominance shifted  
440 among 11 and 10 different taxa, respectively, with particularly rapid dynamics  
441 following the increase in phytoplankton biomass (Figure 3). For the large size  
442 fraction, the same taxa tended to dominate in both the rRNA and rDNA. In the rDNA,  
443 the dominance shifted between *Fluviicola* (24 days), *Roseovarius* (12), *Polaribacter*  
444 (3), *Roseibacillus* (3), Verrucomicrobia (1), and Marine Group II Archaea (1).

445

446 Previously, we reported on a larger diatom bloom that occurred 3 years earlier at  
447 a location about 20 km away (Needham & Fuhrman 2016; Needham et al. 2017). We  
448 also had daily-resolved data for this time-series. For that study we generated 99%  
449 OTUs and then discriminated ASVs within the abundant OTUs (i.e., > 2.5% relative  
450 abundance on any given day, or 0.4% on average). Overall, 119 of the 279 bacterial  
451 and archaeal ASVs that we detected here were also reported in the previous study.  
452 15 of the 20 ASVs that became most abundant during the present study were also  
453 among the ASVs in the previous study. Several of the ASVs became most abundant in  
454 both time-series: members of Flavobacteria (*Polaribacter* and *Formosa*),  
455 Verrucomicrobia (*Roseibacillus* and *Puniceicoccaceae*) Marine Group II Archaea, and  
456 *Roseovarius*, and SAR11. The rapid day-to-day variation 8 April – 12 April is similar  
457 to what we observed previously and in both time-series, and the same ASVs of  
458 *Polaribacter*, *Roseibacillus*, and Marine Group II Archaea became most abundant in  
459 response to increases in chlorophyll, while *Roseovarius*, *Puniceicoccaceae*, and  
460 SAR11 peaked during more stable conditions. However, the response here is not as  
461 pronounced as in 2011, probably because that was a larger bloom, with presumably  
462 a larger release of organic material. The consistency between years of  
463 phytoplankton bloom response, even among exact sequence variants, is similar to  
464 those reported from the North Sea (Chafee et al. 2017).

465

466 Often, particular ASVs were observed within both size fractions, but in the smaller  
467 size fraction, their temporal variation and overall relative abundances were reduced  
468 due to the sustained high relative abundance of SAR11 ASVs (cumulatively 23% and  
469 30% in the rRNA and rDNA in 0.2-1  $\mu$ M, respectively versus 2% and 6% in the 1-300  
470  $\mu$ m size fraction). Besides SAR11, other non-photosynthetic taxa that were higher in  
471 the smaller fraction were the gammaproteobacteria SAR92 and SAR86, and the  
472 alphaproteobacterium, OCS116 (Figure 3, Supplementary Figure 5). Notably a *Vibrio*  
473 ASV peaked up to 30% for one date prior to the bloom (up to 30% in rRNA and 2%  
474 in rDNA). This is surprising considering that *Vibrios* are typically thought to be  
475 “bloom-responders” but here were very active before the bloom, instead.

476

#### 477 *Dynamics of individual eukaryotic taxa via 18S*

478 The whole eukaryotic community (1-300  $\mu$ m) via 18S was often dominated by  
479 metazoans, such as herbivorous copepods (*Paracalanus*) and larvaceans  
480 (*Oikopleura*, which can graze particles as small as bacteria), with a copepod OTU  
481 (*Paracalanus* sp.) being most represented in the rDNA on 34 of 50 samples and  
482 larvacean OTU (*Oikopleura dioica*) being most represented on 16 of 44 dates in the  
483 rRNA (Supplementary Figure 6). Excluding metazoans, we observed 20 different  
484 ‘most abundant’ organisms via rDNA over the 51 sample points, including 21 days  
485 by Ciliates (10 days by *Myrionecta*), 11 days Chlorophytes (*Ostreococcus* (4),  
486 *Bathycoccus* (5), *Micromonas* (2)), and 9 dates Dinoflagellates (primarily *Gyrodinium*  
487 and *Gymnodinium* 4 and 2 dates, respectively) (Figure 3, Supplementary Figure 7).  
488 Similarly, ciliates were typically the most represented taxon in the rRNA (29 of 44  
489 days), but in contrast to the rDNA, Stramenopiles were commonly most represented  
490 (14 of 44) dates, including a MAST-3 relative of *Solenicola* (99% match to clone FGII  
491 (Accession: HM163289) which is usually found associated with chain-forming  
492 diatoms (Padmakumar et al. 2012; Gómez et al. 2011) (6 dates), *Pseudo-nitzschia*  
493 (4), and MAST-1 (Massana et al. 2004), a distant 87% best match to *Rhizidiomyces*  
494 (Hypochoytrids) (4). As suggested by the higher number of most dominant taxa, the  
495 Bray-Curtis community similarity metric showed that the eukaryotic community via  
496 18S was much more variable than the 16S based prokaryotes and phytoplankton



497 (Supplementary Figure 8). The reasons that the dominance patterns vary between  
498 rRNA and rDNA are probably a combination of copy number differences and levels  
499 of activity, even given that dormant cells have a baseline level of rRNA (Blazewicz et  
500 al. 2013).

### 501 **Correlations between taxa**

502 Previously almost all correlation analyses between taxa have been between the  
503 abundance of organisms (DNA- or count- based), irrespective of activity. However  
504 for many types of interactions, it would be valuable to consider some indicator of  
505 activity level of the organisms as well. We aim to do so here by including rRNA in  
506 addition to the rDNA relative abundances in the co-occurrence patterns between  
507 taxa. We first examine known 2-organism positive interactions that occur among  
508 abundant taxa within our samples. This allows assessment of the nature of known  
509 associations in the environment. Additionally, it allows identification of organisms  
510 that may be previously unrecognized members of these associations, including  
511 those that may replace a known member under some circumstances while retaining  
512 similar function. Additionally, we examine the strong correlations across all taxa to  
513 identify possible interactions among and between domains, such as syntrophy,  
514 symbiosis, or grazing.

515

### 516 *UCYN-A and Braarudosphaera*

517 Researchers studying marine nitrogen fixation by molecular genetic analysis of  
518 (*nifH*) genes discovered a widely distributed and important group of nitrogen fixers  
519 that for several years went unidentified, but recently were found to be part of a  
520 symbiotic association (Zehr et al. 2016; Farnelid et al. 2016; Thompson et al. 2012).  
521 The organism, recently named *Candidatus Atelocyanobacterium thalassa*, but still  
522 commonly known as UCYN-A, is a marine unicellular nitrogen-fixing  
523 cyanobacterium with greatly reduced genome for a cyanobacterium, lacking the  
524 ability to generate oxygen (which inhibits nitrogen fixation) and possessing  
525 incomplete TCA cycle pathways (Tripp et al. 2010). Its metabolic deficiencies are  
526 evidently met by having a symbiotic relationship with algae (Thompson et al. 2012).  
527 At least four strains of UCYN-A have been reported (denoted UCYN-A1, A2, A3, and

528 A4), based on phylogeny of the *nifH* sequence. These strains vary in their global  
529 distribution, size, symbiotic hosts, in addition to other genetic and probably  
530 physiological differences (Farnelid et al. 2016). The most well-supported UCYN-A  
531 symbiosis is a relationship between UCYN-A2 and the haptophyte alga  
532 *Braarudosphaera bigelowii* (Zehr et al. 2016; Thompson et al. 2012; Farnelid et al.  
533 2016), in which fixed nitrogen is exchanged for organic substrates UCYN-A needs for  
534 growth. Other UCYN-A types are thought to be associated with different  
535 phytoplankton, including with species closely related to *Braarudosphaera* (Zehr et  
536 al. 2016).

537

538 We observed two 16S ASVs of UCYN-A, each an exact match to genomic sequences  
539 from UCYN-A types. One ASV was a perfect match to a genome sequence of UCYN-A1  
540 (gi|284809060) and another with a perfect match to a genome scaffold of UCYN-A2  
541 (gi|671395793) (Figure 4, Supplementary Figure 7). These two ASVs differed by 3  
542 base pairs over the 375 base pairs 16S amplicon sequence we analyzed. The  
543 dynamics of the rDNA relative abundance of the UCYN-A1 and UCYN-A2 were  
544 similar over the full time-series (Spearman  $r = 0.64$ ). There was a pronounced  
545 increase in both types from 18 April to 25 April when UCYN-A1 increased from  
546 about 0.5% to about 3% in relative abundance of all phytoplankton, while the  
547 increase in UCYN-A2 was less pronounced (it peaked to about 1.5% on 25 April).  
548 Both UCYN-A types also peaked in early March -- though the peaks were offset  
549 slightly (by 1 day via rDNA, 2 days via rRNA). Both were relatively low in early and  
550 late April.

551

552 Overall, the rRNA levels were similar in dynamics to the rDNA and to one another  
553 (Figure 4), though the mid-to-late April peaks were more similar in amplitude and  
554 timing in the rRNA than the rDNA when UCYN-A1 was about 2x as relatively  
555 abundant. The average rRNA relative abundance of UCYN-A1 and UCYN-A2 was  
556 2.4% and 3.1%, respectively, which is was about 3 and 10x the relative  
557 concentration of their rDNA.

558

559 Likewise, *Braarudosphaera bigelowii* (1 bp different over 368 bp (99.7%) to an NCBI  
560 16S chloroplast sequence from *Braarudosphaera*, Accession: AB847986.2, (Hagino et  
561 al. 2013) was high during March, low in early April, peaked during the middle of  
562 April and decreased after April 24 (Figure 4). The rRNA and rDNA of  
563 *Braarudosphaera* chloroplasts were correlated (0.64,  $p < 0.001$ ), with an average  
564 rRNA to rDNA ratio of 0.93.

565

566 In general, *Braarudosphaera* and UCYN-A were highly positively correlated, and the  
567 best correlations were between the *Braarudosphaera* rDNA and UCYN-A1 rDNA ( $r =$   
568 0.85, Figure 4C), while the correlation to UCYN-A2 was not quite as strong ( $r = 0.76$ ).  
569 *Braarudosphaera* rRNA was correlated to both UCYN-A1 and UCYN-A2 rRNA ( $r = 0.81$   
570 and 0.83, respectively). UCYN-A1 rDNA was also significantly correlated to  
571 *Braarudosphaera* rRNA ( $r = 0.63$ ), but the other combinations of rRNA to rDNA and  
572 vice-versa between the taxa were not as significantly correlated (i.e.,  $p < 0.005$ ).  
573 Given that the literature reports a specific relationship between UCYN-A2 and  
574 *Braarudosphaera* and between UCYN-A1 and a closely related taxon (Zehr et al.  
575 2016), it may be that the 16S amplicon sequence does not discriminate between  
576 distinct but closely related haptophyte species that may be present with similar  
577 dynamics. An alternative speculation is that the *Braarudosphaera* strain(s) present  
578 at this site can be a host to UCYN-A1 and UCYN-A2.

579

580 We found that there were several other taxa highly correlated to *Braarudosphaera*,  
581 which implies the possibility of additional members of this known symbiosis, or at  
582 least strong affiliations. A Dictyochophyte alga (rRNA) had a particularly strong  
583 correlation to *Braarudosphaera* ( $r = 0.86$ ), with a slightly weaker correlation  
584 between the rDNA of the two UCYN-A taxa (Figure 4). A Puniceicoccaceae  
585 (Verrucomicrobium) rRNA and rDNA was very strongly correlated to  
586 *Braarudosphaera* (all  $r > 0.81$ ) and UCYN-A1. Verrucomicrobia are often found to be  
587 particle associated (Crespo et al. 2013; Rath et al. 1998; Mestre et al. 2017;  
588 Needham & Fuhrman 2016), and were indeed enriched in the larger size fraction in  
589 our samples, suggesting possible physical attachment in an association. Other ASVs

590 strongly correlated ( $r > 0.8$ ) to *Braarudosphaera* were two photosynthetic algae,  
591 both *Chrysochromulina*, a genus that previous evidence suggests also may be a host  
592 to UCYN-A, particularly UCYN-A1 (Thompson et al. 2012; Zehr et al. 2016) (Figure  
593 4).

#### 594 *Myrionecta* and *Teleaulax*

595 Another known interaction between abundant taxa in our dataset is that of the  
596 ciliate *Myrionecta rubra* (= *Mesodinium rubrum*) with the photosynthetic  
597 cryptophyte, *Teleaulax*. In this interaction, *Myrionecta* is thought to phagocytize  
598 *Teleaulax* and retain functioning *Teleaulax* chloroplast within the *Myrionecta* cells,  
599 becoming functionally phototrophic (Gustafson et al. 2000). *Myrionecta* is not  
600 capable of photosynthesis without this association, but, when possessing the  
601 chloroplasts, it can perform high rates of photosynthesis (Stoecker et al. 1991) and  
602 can form massive blooms (“red tides”)(Taylor et al. 1971). *Myrionecta* is capable of  
603 consuming many strains of cryptophytic algae from the *Teleaulax*/ *Plagioselmis*/  
604 *Geminigera* clade (Peterson et al. 2012; Hansen et al. 2012; Park et al. 2007), but it  
605 appears most often associated with chloroplasts from *Teleaulax amphioxae* (Johnson  
606 et al. 2016; Herfort et al. 2011; Hansen et al. 2006). The exact nature and  
607 mechanisms of the interaction is unclear, but the *Teleaulax* chloroplasts can remain  
608 intact and harbored for days to weeks within the *Myrionecta* (Johnson et al. 2007;  
609 Herfort et al. 2011). The chloroplasts reportedly can be replicated within the  
610 *Myrionecta* with the assistance of captured *Teleaulax* nuclei (Johnson et al. 2007). It  
611 is unclear to what extent the relationship is most similar to *kleptochloroplastic*  
612 relationships, whereby chloroplasts are consumed and used until they lose function  
613 without nuclear assistance; *karyoplastic* ones, whereby chloroplasts can be  
614 maintained by consuming and retention of the nucleus of grazed *Teleaulax*, or an  
615 *endosymbiosis* where *Myrionecta* harbors *Teleaulax* chloroplasts permanently or  
616 nearly so. Alternatively, *Myrionecta* may be “farming” whole *Teleaulax* cells (Qiu et  
617 al. 2016), a conclusion met with firm skepticism (Johnson et al. 2016). Additionally,  
618 *Myrionecta* has been observed to harbor extensive microdiversity, with various  
619 strains co-existing within a location (Herfort et al. 2011) and variability in dominant  
620 types between locations (Herfort et al. 2011; Johnson et al. 2016); the nature of

621 interactions between *Myrionecta* and *Teleaulax* may be variable between different  
622 strains. A further aspect is that the toxic dinoflagellate *Dinophysis* is reported to  
623 obtain its chloroplasts by feeding on *Myrionecta*, which in that case would be an  
624 intermediate source from *Teleaulax* (Garcia-Cuetos et al. 2010; Sjöqvist & Lindholm  
625 2011).

626

627 We found that *Myrionecta* and *Teleaulax* were among the most abundant and  
628 common taxa found in the eukaryotic community (18S) and phytoplankton  
629 communities (via 16S chloroplasts), respectively (Figure 3, Supplementary Figure 4  
630 and 7). On average, the most abundant *Teleaulax* ASV (an exact match over the full  
631 374 base pairs to *Teleaulax amphioxeia*, Supplementary Figure 9) made up 5.5% and  
632 12.4% of chloroplast rDNA and rRNA, respectively and the most abundant  
633 *Myrionecta* OTU (an exact match to *Myrionecta major* strain LGC-2011, which was  
634 described from coastal Denmark, Supplementary Figure 10) made up 2.0% and  
635 2.5% of rDNA and rRNA 18S sequences (Figure 5). The rDNA of these taxa increased  
636 in abundance between April 15 and April 20, and again between 24 April and 26  
637 April. The Spearman correlation between the rDNA of these taxa (*Myrionecta* and  
638 *Teleaulax amphioxeia\_1* chloroplasts) was 0.86 and the relationship seemed highly  
639 exclusive, i.e., no significant correlations to anything else (Figure 5D).

640

641 A second abundant *Teleaulax* chloroplast sequence (3 base pairs different from the  
642 best match, *Teleaulax amphioxeia*) was also commonly detected with an average  
643 abundance of 2.0% rDNA and 1.6% rRNA. This *Teleaulax* chloroplast ASV was not  
644 significantly correlated with *Myrionecta*; however, it was significantly correlated  
645 with a *Teleaulax* 18S (nuclear) OTU ( $r = 0.67$ ,  $p < 0.005$ , Figure 5D). Unlike the  
646 *Myrionecta-Teleaulax* association, these *Teleaulax* taxa were positively correlated  
647 with many other taxa, rDNA of *Synechococcus*, Alphaproteobacteria (OCS116 and  
648 *Defluuivicoccus*) NS5 genus of Bacteroidetes, Marine Group II Archaea, and a  
649 *Sphingobacterium* (all  $r > 0.7$ ).

650

651 Thus, we saw a strong relationship between one ASV of one *Teleaulax\_1* chloroplast  
652 ASV, but not nuclei, and *Myrionecta* over the 1.5 month of study. Additionally, based  
653 on correlation between *Teleaulax* (nuclear) 18S and a second *Teleaulax* chloroplast,  
654 it appears the second strain of free-living *Teleaulax* present may not be associated  
655 with *Myrionecta* cells. We did observe *Dinophysis* in our samples (Supplementary  
656 Figure 4-5), without significant correlations to support a *Myrionecta* or *Teleaulax*  
657 interaction (i.e., secondary kleptoplastidy) specifically or consistently with these  
658 taxa at our location and timeframe; however such a statistical relationship may not  
659 be expected if the abundance of *Dinophysis* is not dependent on contemporaneous  
660 availability of *Myrionecta-Teleaulax* via a specific grazing dependency. In our study,  
661 we found the *Teleaulax* nuclei were regularly present at the sample site, but they did  
662 not correlate with either *Myrionecta-Teleaulax* chloroplast association.

663

664 Our observations of strong, consistent relationship over about 1.5 months between  
665 specific types of *Myrionecta* and chloroplasts from *Teleaulax* lends some support  
666 either the hypothesis that the relationship is an endosymbiosis (Herfort et al. 2011;  
667 Hansen et al. 2006) or that *Myrionecta* can maintain chloroplasts a long time with  
668 the periodic help of *Teleaulax* nuclei (Johnson et al. 2007). Because a single  
669 *Teleaulax* nucleus in a *Myrionecta* cell might support replication of many more  
670 captured chloroplasts than would be found in a single *Teleaulax* cell (Johnson et al.  
671 2007), the possible need for *Teleaulax* nuclei might be hard to discern via  
672 correlations between 18S nuclear genes in our system (i.e., if the ratio of *Teleaulax*  
673 nuclei and chloroplasts is highly variable within *Myrionecta*), in contrast to the  
674 strong correlative relationship between the relative abundances of *Teleaulax*  
675 chloroplasts and *Myrionecta* 18S. Alternatively, other *Teleaulax* nuclei may be  
676 present but in lesser abundance (and 18S copies per cell), reducing the ability to  
677 regularly detect them in strong co-occurrence with the *Teleaulax* and *Myrionecta*.

678

679 *Other correlations between taxa*

680 To gain an understanding for how the communities (i.e. phytoplankton, non-  
681 phytoplankton 16S, 18S, DNA or RNA, different size fractions) changed, overall, in

682 relation to one another, we performed Mantel tests. While all the different  
683 communities were significantly correlated ( $p < 0.001$ ), the strongest correlations  
684 were between phytoplankton via 16S and non-phytoplankton 16S (Supplementary  
685 Figure 11). The best correlation was between the rDNA of the phytoplankton and  
686 the large or particle-attached non-phytoplankton 16S, and the slightly less so to the  
687 free-living and small non-phytoplankton 16S (Figure 6, Supplementary Figure 11).  
688 This is a similar result as we previously reported (Needham and Fuhrman 2016)  
689 where there was a stronger correlation of eukaryotic phytoplankton via  
690 chloroplasts to attached bacteria and archaea than to free-living bacteria and  
691 archaea. The rDNA of phytoplankton 16S was more related to both the rRNA and  
692 rDNA of non-phytoplankton 16S communities, than the rRNA of phytoplankton 16S  
693 was to either. These strong affiliations of phytoplankton and attached bacteria and  
694 archaea are perhaps a result of symbiotic interactions where both phytoplankton  
695 and prokaryotes benefit from the association (Amin et al. 2012, 2015). Another  
696 hypothesis is that different phytoplankton communities generate different  
697 suspended and sinking marine aggregates that in turn harbor different bacterial  
698 communities. There may be stronger relationships between rDNA versus rRNA  
699 because physical attachment, potentially limited by cell numbers (rDNA), is  
700 relatively more important than the potential activity (rRNA) of cells.

701

702 The observation of relatively weak correlation between eukaryotes by 18S to the  
703 other communities may be because grazing may be less species-specific, as has been  
704 previously concluded based on co-occurrence patterns (Chow et al. 2014). Thus, the  
705 strength of correlation between particular grazers and bacteria may not be strong  
706 since grazers may be more likely to graze bacteria of similar size than in a species-  
707 specific manner. This could result in an increase in the abundance of the grazer in  
708 response to an increase in any of a variety of similarly sized bacteria.

709

710 For pairwise correlations, several of the phytoplankton-to-heterotrophic bacteria  
711 correlations are the same as those that we previously reported, including those  
712 between Rhodobacteraceae, *Polaribacter* (Flavobacteria), and SAR92 to diatoms

713 *Pseudo-nitzschia* and *Chaetoceros* (Figure 6), suggesting that these correlations are  
714 specific and repeatable between different time-series even though they were  
715 separated by 3 years and about 20 km. The associations of these prokaryotic groups  
716 with phytoplankton, especially in diatom blooms, have been reported previously,  
717 with responses at time-scales from weeks to months (Teeling et al. 2012 & 2016,  
718 Buchan et al. 2012). These interactions involve finely-resolved taxa (ASVs)  
719 consistent with the patterns uncovered in the North Sea (Chafee et al. 2017).

720

721 We also observed a group of highly positively correlated *Prochlorococcus* ASV to  
722 various Flavobacteria and Verrucomicrobia, indicating the shared ecosystem  
723 preferences or interactions. These taxa all steadily increased in rRNA and rDNA  
724 from about 11 April until to the end of the time-series (Figure 6).

725

726 In addition to those types of interactions that were previously described, we also  
727 observed many strong correlations between heterotrophic or mixotrophic  
728 eukaryotic taxa and potential symbionts or prey (Figure 7). Of these, only 5 taxa had  
729 strong correlations ( $|Spearman\ r| > 0.7$ ,  $p < 0.005$ ) to bacteria or phytoplankton; of  
730 these 4 were ciliates. In addition to the relationship between *Myrionecta* and  
731 *Teleaulax* described previously, the ciliate OTUs of *Strombidium* were shown to have  
732 correlations to a variety of bacteria, including Flavobacteria, Gammaproteobacteria,  
733 relatively rare ASVs classified as mycoplasma, and *Pseudo-nitzschia*. Thus it appears  
734 that these particular ciliates may have specific interactions with these bacteria, and  
735 may be good targets for future analyses to determine the nature of these  
736 interactions. We observed no strong negative correlations ( $Spearman\ r < -0.7$ ), in  
737 contrast to many strong positive ones  $>0.7$  or even 0.8, suggesting that the specific  
738 interactions we observe were much more likely to represent mutually beneficial  
739 interactions, without strong antagonistic relationships. This observation of strong  
740 positive without strong negative correlations in fact applies to all the associations  
741 we observed in this study, generally.

742

743



744 **Conclusions**

745 Our results show a rapid, day-to-day response of particular microbial taxa to  
746 changes in phytoplankton. In this case we saw only a small increase in chlorophyll  
747 (especially compared to previous studies) and yet the patterns we have previously  
748 observed persisted. Observations of microbial dynamics via rRNA and rDNA yielded  
749 somewhat similar results, though the overall proportions of taxa could change  
750 between the rRNA and rDNA, with phytoplankton often dominating the rRNA  
751 sequences. Via co-occurrence patterns, our results provide new *in-situ*  
752 characterizations of previously observed interactions among the most abundant  
753 taxa. They suggested that the *Myrionecta*-to-*Teleaulax* chloroplast association  
754 appeared to occur independently of other microbial associations, while UCYN-A-to-  
755 *Braarudosphaera* co-occurred strongly with several taxa. Overall, the study  
756 reiterates the utility of short-term time-series for understanding environmental  
757 responses and microbe-to-microbe interactions where turnover times can be very  
758 fast.

759

760 **Acknowledgements**

761 We thank the Gordon and Betty Moore Foundation for funding (Grant Number:  
762 3779) and their support of this project. We thank the Scholin Lab at the Monterey  
763 Bay Aquarium Research Institute for deployment, data acquisition, quality control,  
764 and help with experimental design. In particular we thank Christina Preston, Roman  
765 Marin III, James Birch, Scott Jensen, Brent Roman, Bill Ussler, and Kevan Yamahara  
766 for their help with the ESP. We thank the Wrigley Institute of Environmental Studies  
767 for logical support, especially Gordon Boivin. We thank the National Science  
768 Foundation for financial support (Grant Number: 1136818).

769

770 **Conflicts of Interest**

771 The authors declare no conflict of interest

772

773

774

## 775 **References**

- 776 Altschul SF, Gish W, Miller W, Myers EW, Lipman DJ. (1990). Basic local alignment  
777 search tool. *J Mol Biol* 215:403–10.
- 778 Amin SA, Hmelo LR, van Tol HM, Durham BP, Carlson LT, Heal KR, et al. (2015).  
779 Interaction and signalling between a cosmopolitan phytoplankton and associated  
780 bacteria. *Nature* 522:98–101.
- 781 Amin SA, Parker MS, Armbrust EV. (2012). Interactions between diatoms and  
782 bacteria. *Microbiol Mol Biol Rev* 76:667–84.
- 783 Azam F, Fenchel T, Field JG, Gray JS, Thingstad TF. (1983). The Ecological Role of  
784 Water-Column Microbes in the Sea. *Mar Ecol Prog Ser* 10:257–263.
- 785 Bèjà O, Suzuki MT, Heidelberg JF, Nelson WC, Preston CM, Hamada T, et al. (2002).  
786 Unsuspected diversity among marine aerobic anoxygenic phototrophs. *Nature*  
787 415:630–633.
- 788 Blazewicz SJ, Barnard RL, Daly RA, Firestone MK. (2013). Evaluating rRNA as an  
789 indicator of microbial activity in environmental communities: limitations and uses.  
790 *ISME J* 7:2061–2068.
- 791 Bombar D, Heller P, Sanchez-Baracaldo P, Carter BJ, Zehr JP. (2014). Comparative  
792 genomics reveals surprising divergence of two closely related strains of  
793 uncultivated UCYN-A cyanobacteria. *ISME J* 8:2530–2542.
- 794 Brown M V., Fuhrman JA. (2005). Marine bacterial microdiversity as revealed by  
795 internal transcribed spacer analysis. *Aquat Microb Ecol* 41:15–23.
- 796 Buchan A, LeCleir GR, Gulvik CA, González JM. (2014). Master recyclers: features and  
797 functions of bacteria associated with phytoplankton blooms. *Nat Rev Microbiol*  
798 12:686–698.
- 799 Callahan BJ, Mccurdie PJ, Rosen MJ, Han AW, Johnson AJ, Holmes SP. (2016).  
800 DADA2 : High resolution sample inference from amplicon data. *Nat Methods*  
801 13:581–583.
- 802 Campbell BJ, Yu L, Heidelberg JF, Kirchman DL. (2011). Activity of abundant and  
803 rare bacteria in a coastal ocean. *Proc Natl Acad Sci U S A* 108:12776–12781.
- 804 Caporaso JG, Kuczynski J, Stombaugh J, Bittinger K, Bushman FD, Costello EK, et al.  
805 (2010). QIIME allows analysis of high-throughput community sequencing data. *Nat*

806 Methods 7:335–336.

807 Chafee M, Fernández-Guerra A, Buttigieg PL, Gerdt G, Eren AM, Teeling H, et al.  
808 (2017). Recurrent patterns of microdiversity in a temperate coastal marine  
809 environment. *ISME J* 1–16.

810 Chow C-ET, Kim DY, Sachdeva R, Caron DA, Fuhrman JA. (2014). Top-down controls  
811 on bacterial community structure: microbial network analysis of bacteria, T4-like  
812 viruses and protists. *ISME J* 8:816–29.

813 Countway PD, Gast RJ, Savai P, Caron DA. (2005). Protistan Diversity Estimates  
814 Based on 18S rDNA from Seawater Incubations in the Western North Atlantic. *J*  
815 *Eukaryot Microbiol* 52:95–106.

816 Cram JA, Chow C-ET, Sachdeva R, Needham DM, Parada AE, Steele JA, et al. (2014).  
817 Seasonal and interannual variability of the marine bacterioplankton community  
818 throughout the water column over ten years. *ISME J* 1–18.

819 Crespo BG, Pommier T, Fernández-Gómez B, Pedrós-Alió C. (2013). Taxonomic  
820 composition of the particle-attached and free-living bacterial assemblages in the  
821 Northwest Mediterranean Sea analyzed by pyrosequencing of the 16S rRNA.  
822 *Microbiologyopen* 2:541–52.

823 Dandonneau Y, Neveux J. (1997). Diel variations of in vivo fluorescence in the  
824 eastern equatorial Pacific: an unvarying pattern. *Deep Res Part II Top Stud Oceanogr*  
825 44:1869–1880.

826 Decelle J, Romac S, Stern RF, Bendif EM, Zingone A, Audic S, et al. (2015). PhytoREF:  
827 a reference database of the plastidial 16S rRNA gene of photosynthetic eukaryotes  
828 with curated taxonomy. *Mol Ecol Resour* 15:1435–1445.

829 Edgar RC. (2004). MUSCLE: Multiple sequence alignment with high accuracy and  
830 high throughput. *Nucleic Acids Res* 32:1792–1797.

831 Edgar RC. (2013). UPARSE: highly accurate OTU sequences from microbial amplicon  
832 reads. *Nat Methods* 10:996–8.

833 Eren AM, Maignien L, Sul WJ, Murphy LG, Grim SL, Morrison HG, et al. (2013).  
834 Oligotyping: Differentiating between closely related microbial taxa using 16S rRNA  
835 gene data. *Methods Ecol Evol* 4:1111–1119.

836 Eren AM, Morrison HG, Lescault PJ, Reveillaud J, Vineis JH, Sogin ML. (2014).

837 Minimum entropy decomposition: Unsupervised oligotyping for sensitive  
838 partitioning of high-throughput marker gene sequences. *ISME J* 9:968–979.

839 Farnelid H, Turk-Kubo K, Muñoz-Marín M, Zehr JP. (2016). New insights into the  
840 ecology of the globally significant uncultured nitrogen-fixing symbiont UCYN-A.  
841 *Aquat Microb Ecol* 77:125–138.

842 Fuhrman JA, Azam F. (1982). Thymidine incorporation as a measure of  
843 heterotrophic bacterioplankton production in marine surface waters: Evaluation  
844 and field results. *Mar Biol* 66:109–120.

845 Fuhrman JA, Comeau DE, Hagstrom A, Chan AM. (1988). Extraction from natural  
846 planktonic microorganisms of DNA suitable for molecular biological studies. *Appl*  
847 *Environ Microbiol* 54:1426–1429.

848 Fuhrman JA, Cram JA, Needham DM. (2015). Marine microbial community dynamics  
849 and their ecological interpretation. *Nat Rev Microbiol* 13:133–146.

850 Fuhrman JA, Hewson I, Schwalbach MS, Steele JA, Brown M V., Naeem S. (2006).  
851 Annually reoccurring bacterial communities are predictable from ocean conditions.  
852 *Proc Natl Acad Sci U S A* 103:13104–13109.

853 Fuhrman JA, Schwalbach MS, Stingl U. (2008). Proteorhodopsins: an array of  
854 physiological roles? *Nat Rev Micro* 6:488–494.

855 Garcia-Cuetos L, Moestrup Ø, Hansen PJ, Daugbjerg N. (2010). The toxic  
856 dinoflagellate *Dinophysis acuminata* harbors permanent chloroplasts of  
857 cryptomonad origin, not kleptochloroplasts. *Harmful Algae* 9:25–38.

858 Gilbert JA, Steele JA, Caporaso JG, Steinbrück L, Reeder J, Temperton B, et al. (2012).  
859 Defining seasonal marine microbial community dynamics. *ISME J* 6:298–308.

860 Gómez F, Moreira D, Benzerara K, López-garcía P. (2011). *Solenicola setigera* is the  
861 first characterized member of the abundant and cosmopolitan uncultured marine  
862 stramenopile group MAST-3. *Environ Microbiol* 13:193–202.

863 Guindon S, Dufayard J, Lefort V, Anisimova M, Hordijk W, Gascuel O. (2010). New  
864 algorithms and methods to estimate maximum-likelihood phylogenies: Assessing  
865 the performance of PhyML 3.0. *Syst Biol* 59:307–21.

866 Gustafson DE, Stoecker DK, Johnson MD, Van Heukelem WF, Sneider K. (2000).  
867 Cryptophyte algae are robbed of their organelles by the marine ciliate *Mesodinium*

868 *rubrum*. *Nature* 405:1049–1052.

869 Hagino K, Onuma R, Kawachi M, Horiguchi T. (2013). Discovery of an endosymbiotic  
870 nitrogen-fixing cyanobacterium UCYN-A in *Braarudosphaera bigelowii*  
871 (Prymnesiophyceae). *PLoS One* 8:e81749.

872 Hamersley M, Turk K, Leinweber A, Gruber N, Zehr JP, Gunderson T, et al. (2011).  
873 Nitrogen fixation within the water column associated with two hypoxic basins  
874 within the Southern California Bight. *Aquat Microb Ecol* 63:193–205.

875 Hansen PJ, Fenchel TOM, Juel Hansen P. (2006). The bloom-forming ciliate  
876 *Mesodinium rubrum* harbours a single permanent endosymbiont. *Mar Biol Res*  
877 2:169–177.

878 Hansen PJ, Moldrup M, Tarangkoon W, Garcia-Cuetos L, Moestrup. (2012). Direct  
879 evidence for symbiont sequestration in the marine red tide ciliate *Mesodinium*  
880 *rubrum*. *Aquat Microb Ecol* 66:63–75.

881 Herfort L, Peterson TD, McCue LA, Crump BC, Prah FG, Baptista AM, et al. (2011).  
882 *Myrionecta rubra* population genetic diversity and its cryptophyte chloroplast  
883 specificity in recurrent red tides in the Columbia River estuary. *Aquat Microb Ecol*  
884 62:85–97.

885 Hunt DE, Lin Y, Church MJ, Karl DM, Tringe SG, Izzo LK, et al. (2013). Relationship  
886 between abundance and specific activity of bacterioplankton in open ocean surface  
887 waters. *Appl Environ Microbiol* 79:177–184.

888 Jeraldo P, Kalari K, Chen X, Bhavsar J, Mangalam A, White B, et al. (2014). IM-  
889 TORNADO: a tool for comparison of 16S reads from paired-end libraries. *PLoS One*  
890 9:e114804.

891 Johnson MD, Beaudoin DJ, Laza-martinez A, Dyhrman ST, Fensin E, Lin S, et al.  
892 (2016). The Genetic Diversity of *Mesodinium* and Associated Cryptophytes. *Front*  
893 *Aquat Microbiol* 7.

894 Johnson MD, Oldach D, Delwiche CF, Stoecker DK. (2007). Retention of  
895 transcriptionally active cryptophyte nuclei by the ciliate *Myrionecta rubra*. *Nature*  
896 445:426–8.

897 Johnson MD, Tengs T, Oldach DW, Delwiche CF, Stoecker DK. (2004). Highly  
898 Divergent SSU rRNA Genes Found in the Marine Ciliates *Myrionecta rubra* and

899 *Mesodinium pulex*. *Protist* 155:347–359.

900 Könneke M, Bernhard AE, de la Torre JR, Walker CB, Waterbury JB, Stahl DA. (2005).  
901 Isolation of an autotrophic ammonia-oxidizing marine archaeon. *Nature* 437:543–  
902 546.

903 Lankiewicz TS, Cottrell MT, Kirchman DL. (2016). Growth rates and rRNA content of  
904 four marine bacteria in pure cultures and in the Delaware estuary. *ISME J* 10:823–  
905 832.

906 Martin M. (2011). Cutadapt removes adapter sequences from high-throughput  
907 sequencing reads. *EMBnet.journal* 17.

908 Massana R, Castresana J, Balague V, Guillou L, Romari K, Groisillier A, et al. (2004).  
909 Phylogenetic and Ecological Analysis of Novel Marine Stramenopiles. *Appl Environ*  
910 *Microbiol* 70:3528–3534.

911 McDonald D, Price MN, Goodrich J, Nawrocki EP, DeSantis TZ, Probst A, et al. (2012).  
912 An improved Greengenes taxonomy with explicit ranks for ecological and  
913 evolutionary analyses of bacteria and archaea. *ISME J* 6:610–8.

914 Mestre M, Borrull E, Sala Mm, Gasol JM. (2017). Patterns of bacterial diversity in the  
915 marine planktonic particulate matter continuum. *ISME J* 1–12.

916 Mitra A, Flynn KJ, Tillmann U, Raven JA, Caron DA, Stoecker DK, et al. (2016).  
917 Defining Planktonic Protist Functional Groups on Mechanisms for Energy and  
918 Nutrient Acquisition: Incorporation of Diverse Mixotrophic Strategies. *Protist*  
919 167:106–120.

920 Needham DM, Fuhrman JA. (2016). Pronounced daily succession of phytoplankton,  
921 archaea and bacteria following a spring bloom. *Nat Microbiol* 1:16005.

922 Needham DM, Sachdeva R, Fuhrman JA. (2017). Ecological dynamics and co-  
923 occurrence among marine phytoplankton, bacteria and myoviruses shows  
924 microdiversity matters. *ISME J* 11:1614–1629.

925 Oksanen AJ, Blanchet FG, Kindt R, Legendre P, Minchin PR, Hara RBO, et al. (2015).  
926 *vegan*: Community Ecology Package.

927 Padmakumar KB, Cicily L, Shaji A, Maneesh TP, Sanjeevan VN. (2012). Symbiosis  
928 between the stramenopile protist *Solenicola setigera* and the diatom *Leptocylindrus*  
929 *mediterraneus* in the North Eastern Arabian Sea. *Symbiosis* 56:97–101.

- 930 Parada AE, Needham DM, Fuhrman JA. (2016). Every base matters: assessing small  
931 subunit rRNA primers for marine microbiomes with mock communities, time-series  
932 and global field samples. *Environ Microbiol* 18:1403–1414.
- 933 Park JS, Myung G, Kim HS, Cho BC, Yih W. (2007). Growth responses of the marine  
934 photosynthetic ciliate *Myrionecta rubra* to different cryptomonad strains. *Aquat*  
935 *Microb Ecol* 48:83–90.
- 936 Peterson TD, Golda RL, Garcia ML, Li B, Maier MA, Needoba JA, et al. (2012).  
937 Associations between *Mesodinium rubrum* and cryptophyte algae in the Columbia  
938 River estuary. *Aquat Microb Ecol* 68:117–130.
- 939 Pruesse E, Quast C, Knittel K, Fuchs BM, Ludwig W, Peplies J, et al. (2007). SILVA: a  
940 comprehensive online resource for quality checked and aligned ribosomal RNA  
941 sequence data compatible with ARB. *Nucleic Acids Res* 35:7188–7196.
- 942 Qiu D, Huang L, Lin S. (2016). Cryptophyte farming by symbiotic ciliate host  
943 detected in situ. *Proc Natl Acad Sci U S A* 199:201612483.
- 944 R Core Team. (2015). R: A Language and Environment for Statistical Computing.
- 945 Rath J, Wu KY, Herndl GJ, DeLong EF. (1998). High phylogenetic diversity in a  
946 marine snow-associated bacterial assemblage. *Aquat. Microb. Ecol.* 14:261–269.
- 947 Scholin C, Doucette G, Jensen S, Roman B, Pargett D, Marin RI, et al. (2009). Remote  
948 detection of marine microbes, small invertebrates, harmful algae, and biotoxins  
949 using the Environmental Sample Processor (ESP). *Oceanography* 22:158–167.
- 950 Schwalbach MS, Fuhrman JA. (2005). Wide-ranging abundances of aerobic  
951 anoxygenic phototrophic bacteria in the world ocean revealed by epifluorescence  
952 microscopy and quantitative PCR. *Limnol Oceanogr* 50:620–628.
- 953 Sjöqvist CO, Lindholm TJ. (2011). Natural co-occurrence of *dinophysis acuminata*  
954 (*Dinoflagellata*) and *mesodinium rubrum* (*Ciliophora*) in thin layers in a coastal  
955 inlet. *J Eukaryot Microbiol* 58:365–372.
- 956 Stoecker DK, Putt M, Davis LH, Michaels AE. (1991). Photosynthesis in *Mesodinium*  
957 *rubrum*: species specific measurements and comparison to community rates. *Mar*  
958 *Ecol Prog Ser* 73:245–252.
- 959 Taylor FJR, Blackbourn DJ, Blackbourn J. (1971). The Red-Water Ciliate *Mesodinium*  
960 *rubrum* and its “Incomplete Symbionts”: A Review Including New Ultrastructural

- 961 Observations. *J Fish Res Board Canada* 28:391–407.
- 962 Teeling H, Fuchs BM, Becher D, Klockow C, Gardebrecht A, Bennke CM, et al. (2012).  
963 Substrate-controlled succession of marine bacterioplankton populations induced by  
964 a phytoplankton bloom. *Science* 336:608–611.
- 965 Teeling H, Fuchs BM, Bennke CM, Krüger K, Chafee M, Kappelmann L, et al. (2016).  
966 Recurring patterns in bacterioplankton dynamics during coastal spring algae  
967 blooms. *Elife* 5:1–31.
- 968 Thompson AW, Foster RA, Krupke A, Carter BJ, Musat N, Vaulot D, et al. (2012).  
969 Unicellular Cyanobacterium Symbiotic with a Single-Celled Eukaryotic Alga. *Science*  
970 337:1546–1550.
- 971 Tikhonov M, Leach RW, Wingreen NS. (2015). Interpreting 16S metagenomic data  
972 without clustering to achieve sub-OTU resolution. *ISME J* 9:68–80.
- 973 Trinh RC, Fichot CG, Gierach MM, Holt B, Malakar NK, Hulley G, et al. (2017).  
974 Application of Landsat 8 for monitoring impacts of wastewater discharge on coastal  
975 water quality. *Front Mar Sci* 4:329.
- 976 Tripp HJ, Bench SR, Turk K a, Foster R a, DeSantis TZ, Niazi F, et al. (2010). Metabolic  
977 streamlining in an open-ocean nitrogen-fixing cyanobacterium. *Nature* 464:90–4.
- 978 de Vargas C, Audic S, Henry N, Decelle J, Mahé F, Logares R, et al. (2015). Eukaryotic  
979 plankton diversity in the sunlit ocean. *Science* 348:1261605-1–11.
- 980 Worden AZ, Follows MJ, Giovannoni SJ, Wilken S, Zimmerman AE, Keeling PJ. (2015).  
981 Rethinking the marine carbon cycle: Factoring in the multifarious lifestyles of  
982 microbes. *Science* 347:1257594–1257594.
- 983 Xia LC, Ai D, Cram JA, Fuhrman JA, Sun F. (2013). Efficient statistical significance  
984 approximation for local similarity analysis of high-throughput time series data.  
985 *Bioinformatics* 29:230–7.
- 986 Xia LC, Steele JA, Cram JA, Cardon ZG, Simmons SL, Vallino JJ, et al. (2011). Extended  
987 local similarity analysis (eLSA) of microbial community and other time series data  
988 with replicates. *BMC Syst Biol* 5:1–12.
- 989 Zehr JP, Bench SR, Carter BJ, Hewson I, Niazi F, Shi T, et al. (2008). Globally  
990 Distributed Uncultivated oceanic N<sub>2</sub>-Fixing Cyanobacteria Lack Oxygenic  
991 Photosystem II. *Nature* 322:1110–1112.



- 992 Zehr JP, Shilova IN, Farnelid HM, Muñoz-Marín M del C, Turk-Kubo KA. (2016).  
993 Unusual marine unicellular symbiosis with the nitrogen-fixing cyanobacterium  
994 UCYN-A. Nat Microbiol 2:1:10.  
995  
996

Figure 1

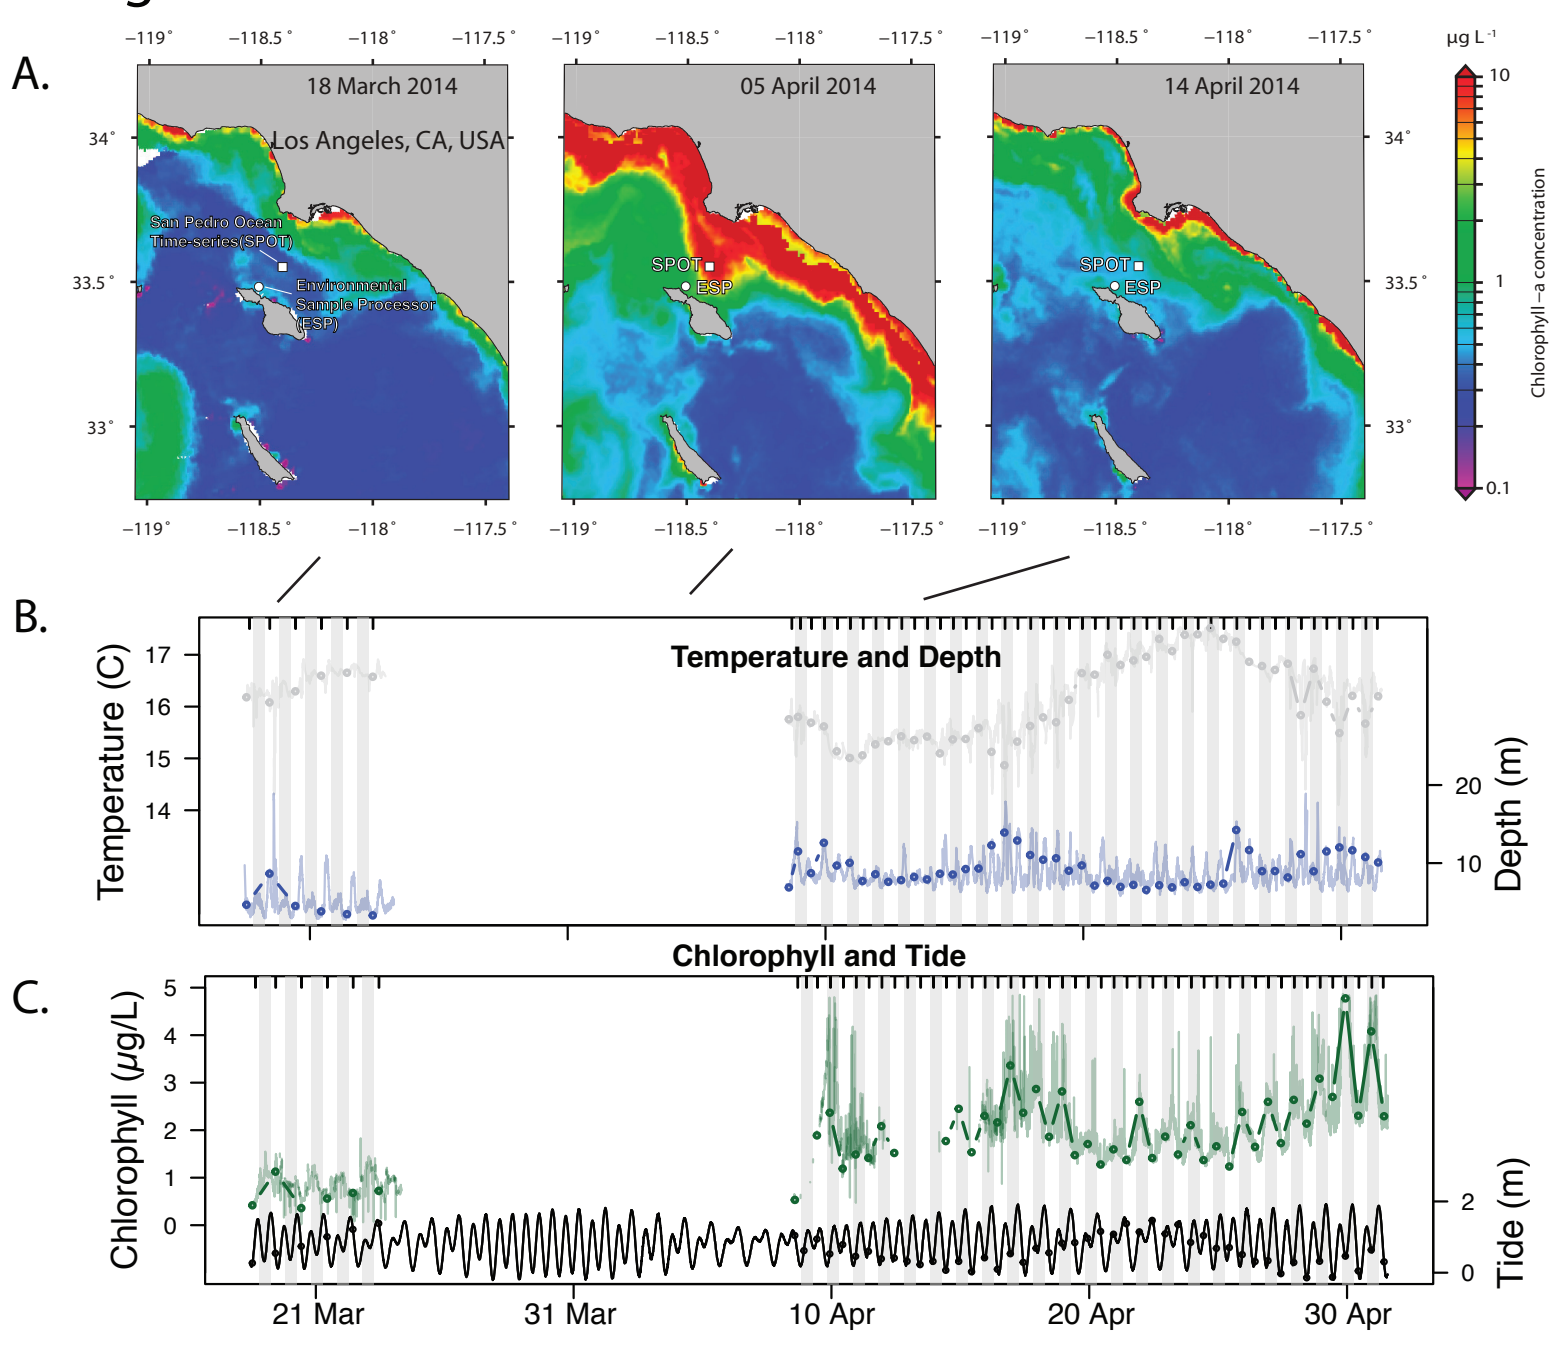

Figure 1 | Environmental context for the Environmental Sample Processor (ESP) deployment near Santa Catalina Island 18 Mar-1 May 2014. Sampling did not occur for about 2 weeks 23 Mar - 9 Apr due to ESP disconnection. Before the interruption, the in-situ microbial community was collected daily at 10:00, and, after, twice daily at 10:00 and 22:00. During the interruption, A.) satellite chlorophyll measurements indicated a small increase in chlorophyll occurred throughout the San Pedro Channel, peaking 4 days before resumption of sampling. B.) Temperature and depth, and C.) Chlorophyll and Tide measurements were taken from the ESP every 5 minutes (the thin lines); the circles represent the average value during sample collection (usually about 30 minutes). Sampling times are indicated by ticks at the top of B.) and C.)

Figure 2

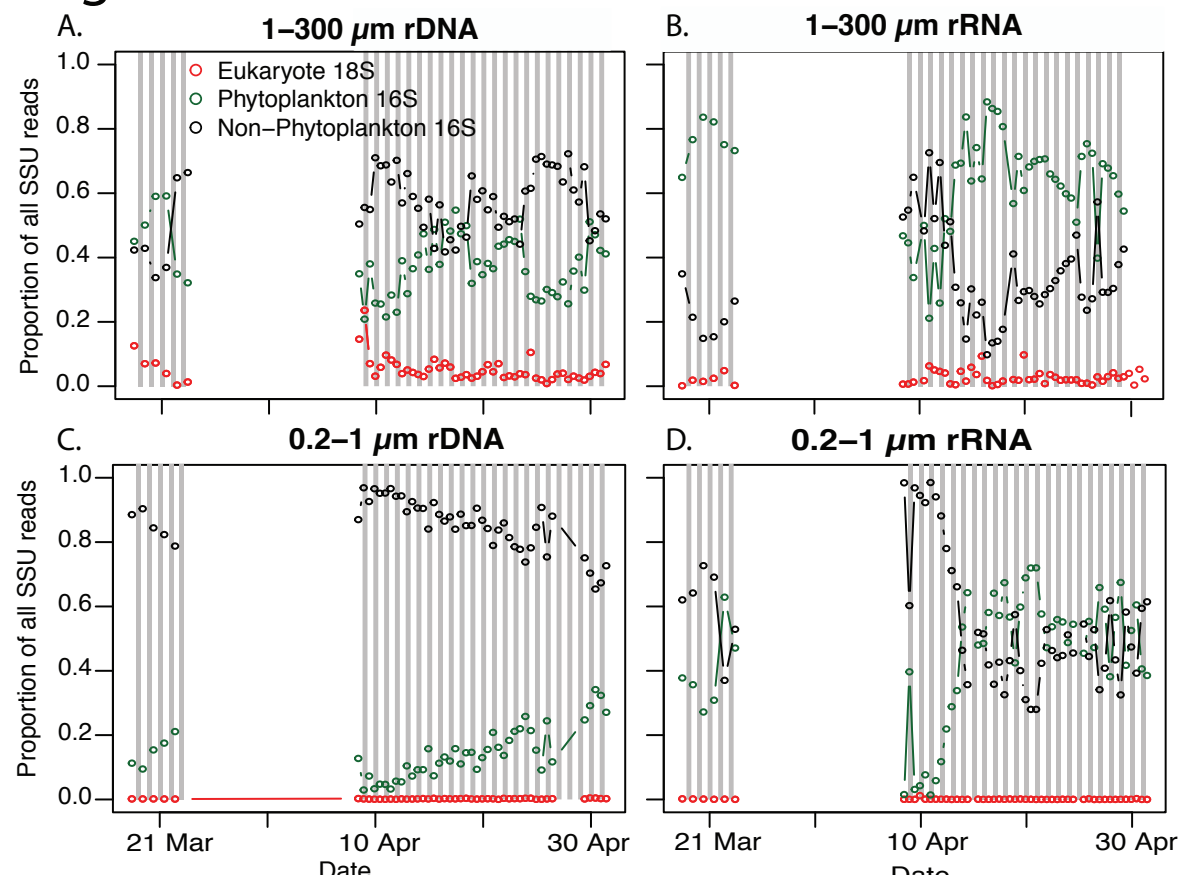

Figure 2 | Dynamics of the overall proportion of sequences observed by the single primer set we used: “phytoplankton” 16S (i.e., chloroplast 16S and cyanobacterial 16S), “non-phytoplankton” 16S (all remaining 16S sequences), and 18S sequences. Data are shown for the A.) 1-300  $\mu\text{m}$  size fraction rDNA, B.) 1-300  $\mu\text{m}$  rRNA, C.) 0.2-1  $\mu\text{m}$  rDNA, and D.) 0.2-1  $\mu\text{m}$  rRNA.

Figure 3

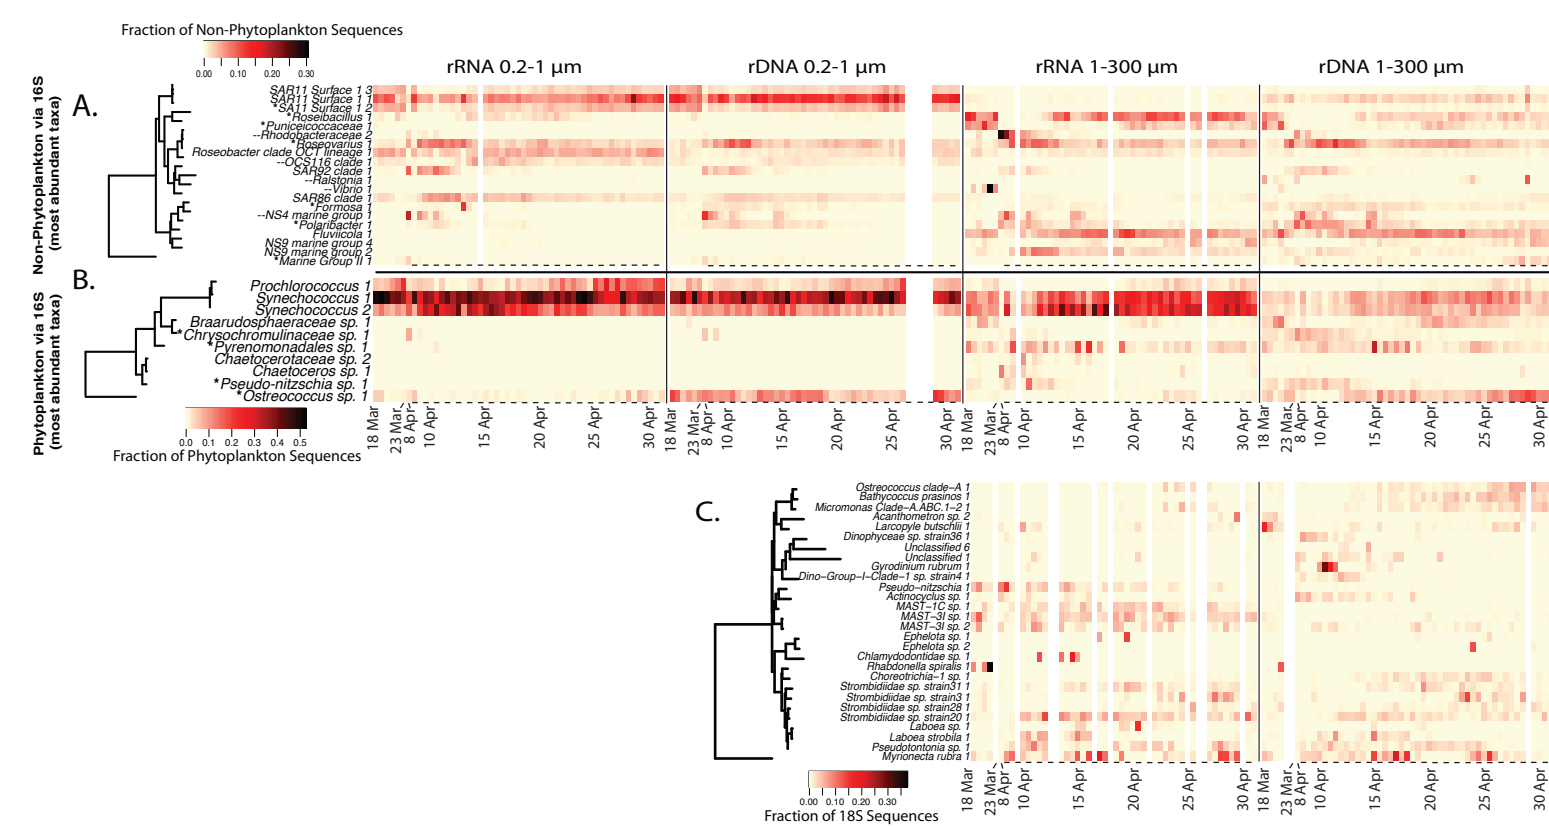

Figure 3 | Daily rRNA and rDNA dynamics of microbial taxa via 16S and 18S. Heatmaps include data from A.) “non-phytoplankton” bacteria and archaea via 16S, B.) “phytoplankton”, rDNA via 16S of chloroplasts and cyanobacteria, and C.) eukaryotic taxa via 18S sequences, excluding metazoan sequences. Only ASVs (16S) or OTUs (18S) that ever became most abundant in either dataset (rRNA or rDNA) as a fraction within the respective datasets are shown. The tree shows the phylogenetic relatedness of the ASV or OTU according to the amplicon sequencing region. Note that *Myrionecta* is known to have a very aberrant 18S sequence (Johnson et al. 2004). For the dates where two samples were taken per day (10:00 AM and 10:00 PM, 10 April - 1 May), a dash underneath a given sample indicates the sample was taken at night. Note, all 16S ASVs shown here were also detected during the 2011 diatom bloom study (Needham and Fuhrman 2016, Needham et al. 2017), except where “-” is found next to the ASV name; asterisks next to taxon names indicate that ASV was also found to most abundant during the 2011 study.

Figure 4

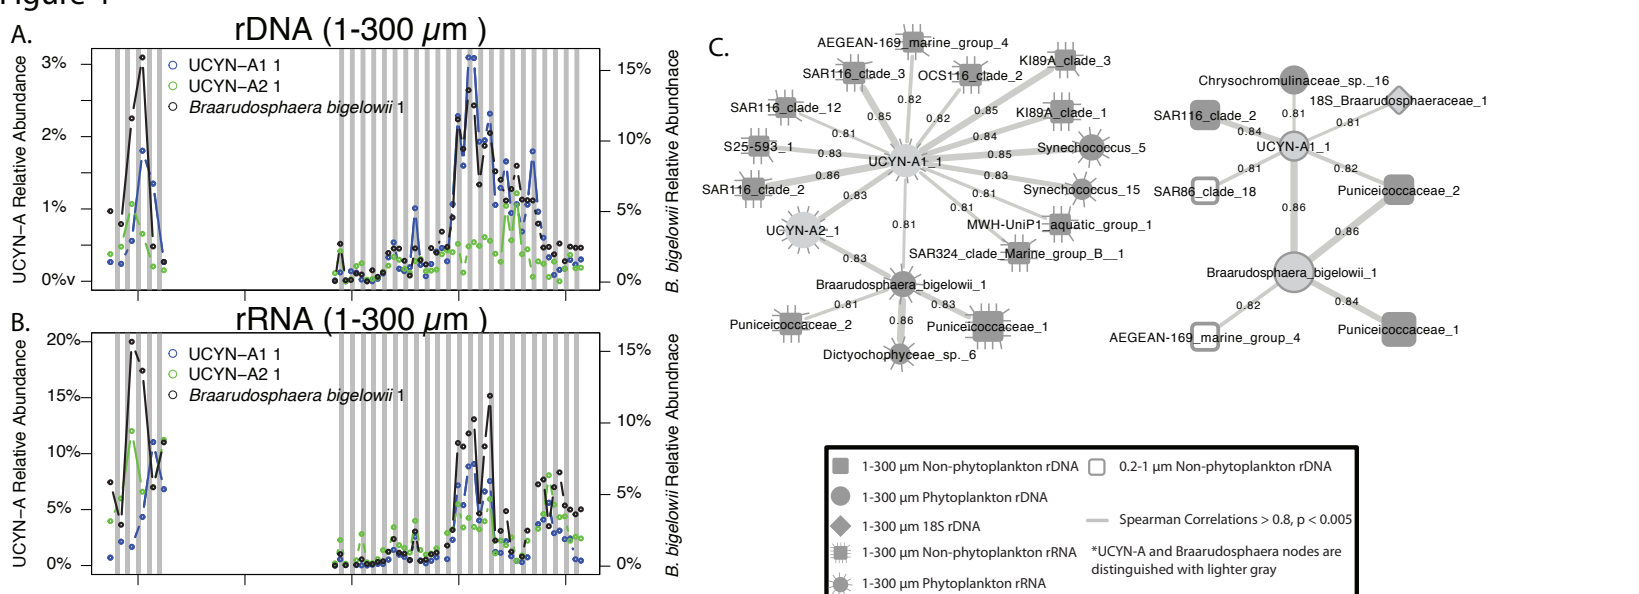

Figure 4 | Co-occurrence of reported symbionts of UCYN-A and *Braarudosphaera* for A.) rDNA and B.) rRNA as proportion of all phytoplankton via 16S chloroplasts and 16S of cyanobacteria in the 1-300  $\mu\text{m}$  size fraction. C.) Co-occurrence network of taxa positively correlated to UCYN-A or *Braarudosphaera* taxa where circles, squares, and diamonds represent, phytoplankton (16S), non-phytoplankton (16S), and eukaryotes (18S), respectively. Nodes filled in with gray shading and open are from the 1-300  $\mu\text{m}$  and 0.2-1  $\mu\text{m}$  size fractions, respectively. Darker gray nodes indicate the UCYN-A and *Braarudosphaera* nodes. A dashed line surrounding a node indicates the node represents data from the rRNA dataset, whereas a solid line or no-line indicates rDNA. Lines connecting edges indicate positive correlations (Spearman  $> 0.8$ ,  $p < 0.001$ ) and line thickness corresponds with strength of correlation.

Figure 5

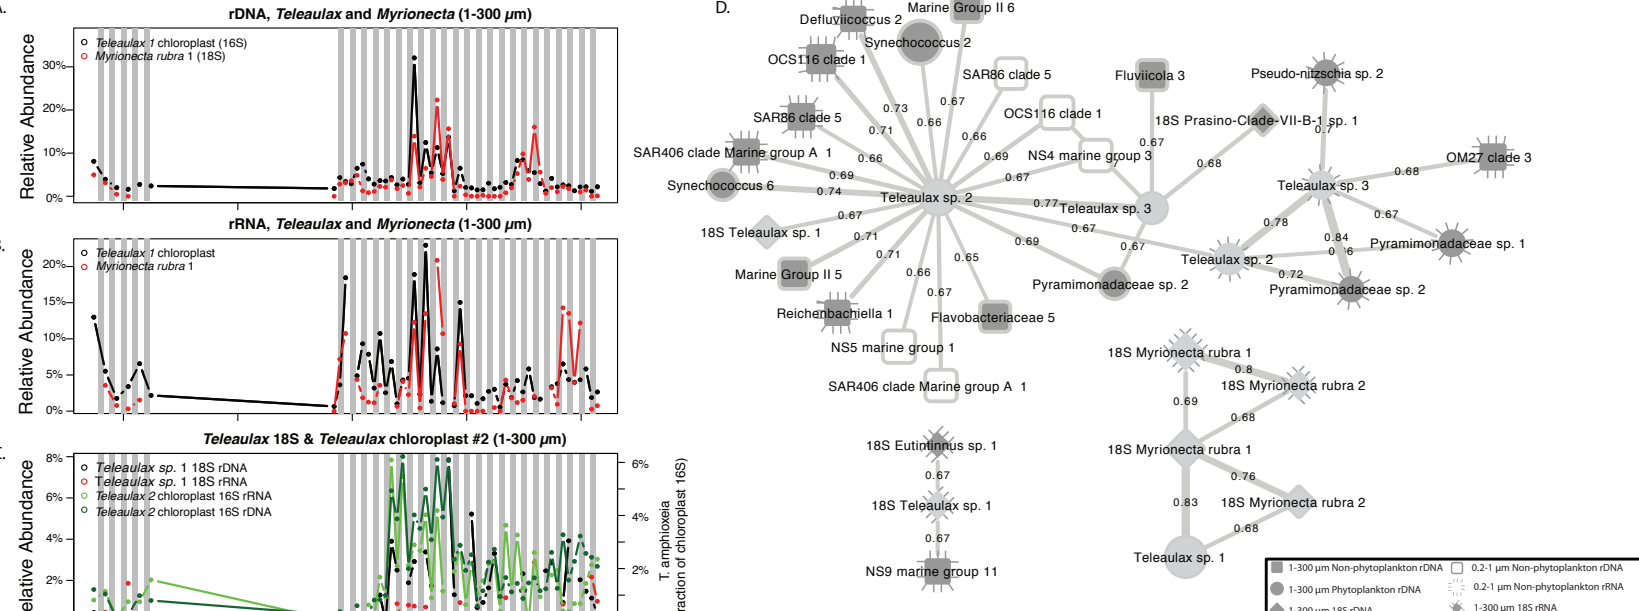

Figure 5 | Co-occurrence of symbionts of *Myrionecta rubra* and *Teleaulax*. Dynamics of the dominant ASVs of *Myrionecta* and *Teleaulax* chloroplast A.) rDNA, and B.) rRNA. Additionally, the dynamics of C.) second *Teleaulax* chloroplast ASV and the dominant *Teleaulax* 18S. D.) Co-occurrence network of taxa positively correlated to *Myrionecta* and *Teleaulax* taxa showing that the dynamics of the apparent symbionts are not correlated to other taxa. Network colors and shapes are the same as in Figure 4.

Figure 6 Correlations between phytoplankton and all other taxa

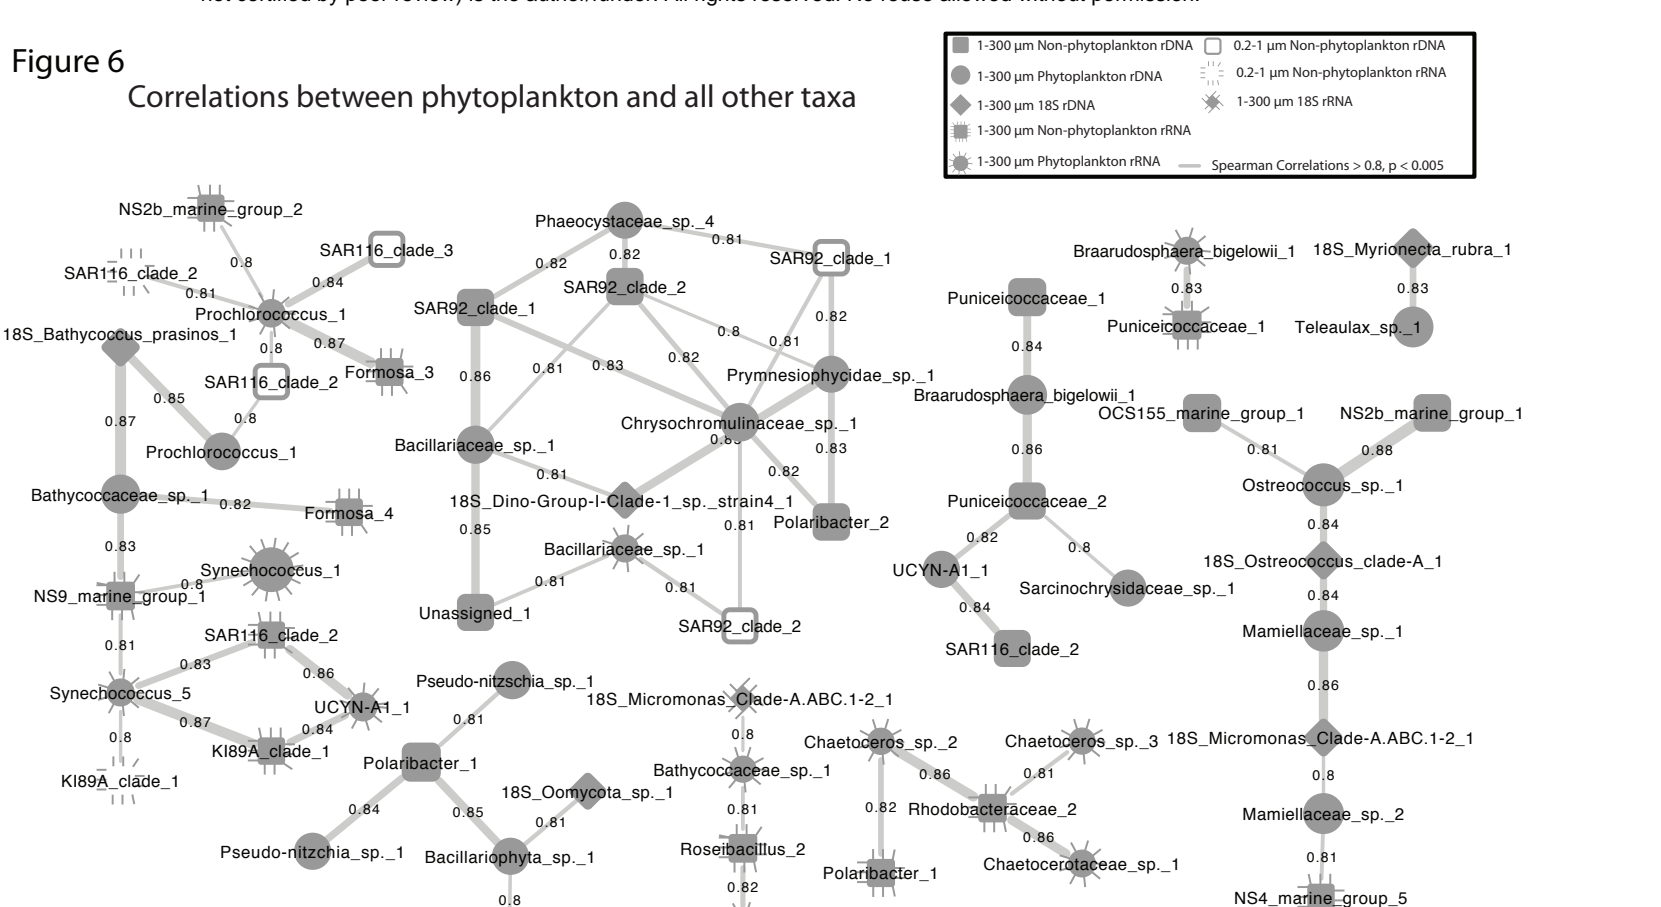

Figure 6 | Network showing pairwise positive correlations between phytoplankton to non-phytoplankton (16S) or eukaryotes (18S). As in Figure 4, nodes filled in with gray shading and open are from the 1-300  $\mu\text{m}$  and 0.2-1  $\mu\text{m}$  size fractions, respectively. A dashed line surrounding a node indicates the node represents data from the rRNA dataset, whereas a solid line or no-line indicates rDNA. Lines connecting edges indicate positive correlations (Spearman  $> 0.8$ ,  $p < 0.001$ ) and line thickness corresponds with strength of correlation. Only taxa with average relative abundance  $> 0.5\%$  are shown.

Figure 7

Correlations between heterotrophic eukaryotes and all other taxa

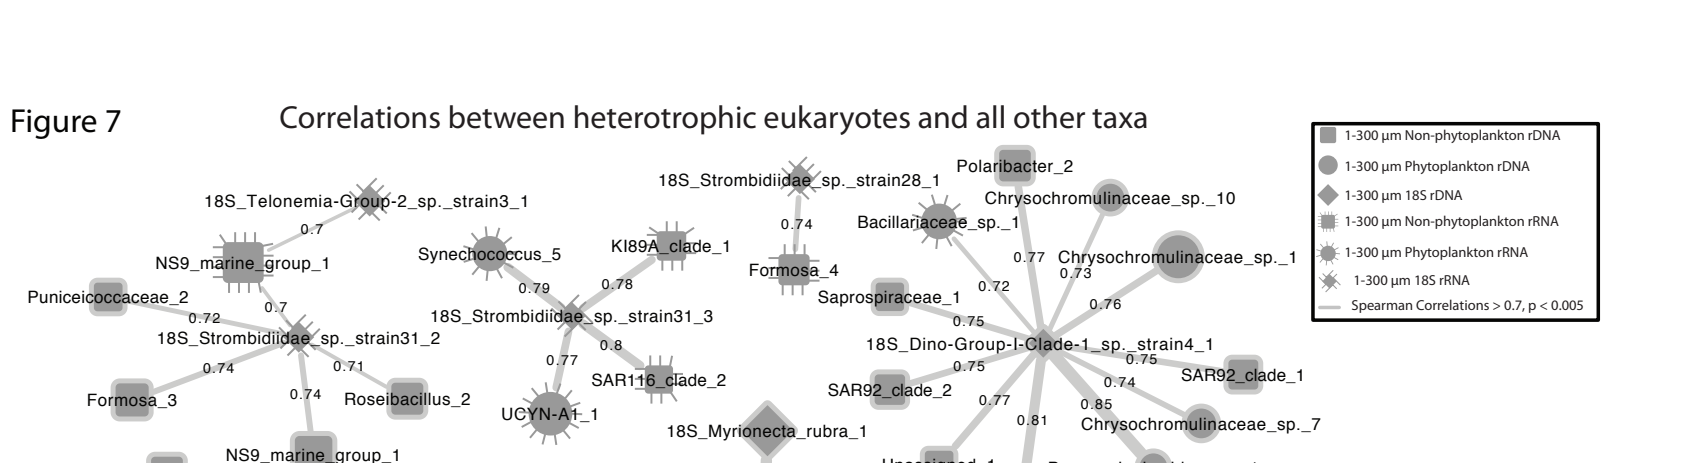

Figure 7 | Network showing pairwise positive correlations between heterotrophic eukaryotes to prokaryotes and phytoplankton. Vertical lines surrounding a node indicates the node represents data from the rRNA dataset, whereas no-line indicates rDNA. Lines connecting edges indicate correlations (Spearman  $> 0.7$ ,  $p < 0.001$ ; no correlations were observed  $< 0.7$ ) and line thickness corresponds with strength of correlation.
